# Supplementary material for: Review Article: Permafrost Trapped Natural Gas in Svalbard, Norway
Source: Copernicus journal article supplement (doi:10.5194/tc-2021-226), 2021-08-09
Supplement: Supplementary file [file tc-2021-226-RC3-supplement.pdf]

# Permafrost Trapped Natural Gas in Svalbard, Norway

Authors: Thomas Birchall<sup>\*1, 2</sup>, Malte Jochmann<sup>1, 3</sup>, Peter Betlem<sup>1, 2</sup>, Kim Senger<sup>1</sup>, Andrew Hodson<sup>1</sup>, Snorre Olaussen<sup>1</sup>

<sup>1</sup>Department of Arctic Geology, The University Centre in Svalbard, P.O. Box 156, N-9171 Longyearbyen, Svalbard, Norway

<sup>2</sup>Department of Geosciences, University of Oslo, P.O. Box 1047, Blindern, 0316 Oslo, Norway

<sup>3</sup>Store Norske Spitsbergen Kulkompani AS, Vei 610 2, 9170 Longyearbyen, Svalbard. Norway

*\*Correspondence to: Thomas Birchall ([Thomas.birchall@unis.no](mailto:Thomas.birchall@unis.no))*

**Abstract.** Permafrost has become an increasingly important subject in the High Arctic archipelago of Svalbard. However, whilst the uppermost permafrost intervals have been well studied, the processes at its base and the impacts of the underlying geology have been largely overlooked. More than a century of coal, hydrocarbon and scientific drilling through the permafrost interval shows that accumulations of natural gas trapped at the base of permafrost is alarmingly common. They exist throughout Svalbard in several stratigraphic intervals and show both thermogenic and biogenic origins. These accumulations combined with the relatively young permafrost age indicate gas migration, driven by isostatic rebound, is presently ongoing throughout Svalbard. The accumulation sizes are uncertain, but one case demonstrably produced several million cubic metres of gas over eight years. Gas encountered in two boreholes on the island of Hopen appears to be situated in the gas hydrate stability zone and thusly extremely voluminous. While permafrost is demonstrably ice-saturated and acting as seal to gas in lowland areas, in the highlands it appears to be more complex, and often dry and permeable. Svalbard shares a similar geological and glacial history with much of the Circum-Arctic meaning that sub-permafrost gas accumulations are regionally common. With permafrost thawing in arctic regions, there is a risk that the impacts of releasing of sub-permafrost trapped methane is largely overlooked when assessing positive climatic feedback effects.

## Keywords

Permafrost; Top seal; Natural Gas; Cryosphere; Greenhouse Gas; Arctic; Greenhouse Gas; Hydrates.

## 1 Introduction

I don't think using the term 'generally accepted' is reasonable if  
you can only cite one reference- please add more

It is generally accepted that thawing permafrost results in the release of methane gas to the atmosphere (Knoblauch et al., 2018). Methane is a potent greenhouse gas and its release from permafrost acts as a positive

climatic feedback loop (Boucher et al., 2009; Howarth et al., 2011; Lashof and Ahuja, 1990). The Arctic is particularly sensitive to climatic changes and Svalbard is even more so due to the West Spitsbergen Current (Divine and Dick, 2006; Van Pelt et al., 2016; Aagaard et al., 1987). Svalbard is, therefore, a critical site for studying the evolution of permafrost and sub-permafrost processes (Hornum et al., 2020; Hodson et al., 2019; Christiansen et al., 2010; Isaksen et al., 2000).

While methane emissions from thawing of the permafrost active layer is relatively well understood (Knoblauch et al., 2018; Vonk and Gustafsson, 2013), the prevalence and volumes of gas accumulations trapped beneath the permafrost “cryospheric cap” (Anthony et al., 2012) has been much less studied. Here we present evidence of such gas accumulations in Svalbard, where the relatively young permafrost (Gilbert et al., 2018) appears to be regionally sealing significant gas accumulations. The gas here may originate from biogenic or thermogenic processes (Hodson et al., 2019; Ohm et al., 2019) and may be in free-form or, under the right compositional and thermobaric conditions, in the form of natural gas hydrates (Sloan Jr et al., 2007; Betlem et al., 2019).

Occurrences of gas originating from within or below intervals of permafrost are typically identified in studies on natural gas hydrates and have been documented in both the Russian (Chuvilin et al., 2000; Makogon and Omelchenko, 2013; Yakushev and Chuvilin, 2000; Skorobogatov et al., 1998; Chuvilin et al., 2020) and North American Arctic (Bily and Dick, 1974; Collett et al., 2011; Kamath et al., 1987; Majorowicz and Hannigan, 2000; Nielsen et al., 2014).

Permafrost is defined as ground that remains at sub-zero (in Celsius) temperature for more than two consecutive years, regardless of fluid content. Physically speaking, ice-saturated permafrost possesses extremely good sealing properties (Keating et al., 2018). However, how effective it is as a top seal is uncertain, this is reflected in Svalbard by methane emissions at pingos (Hodson et al., 2019) where permafrost demonstrates its local sealing ability but also the prevalence of migration pathways through it. Abrupt changes in hydrogeological flow conditions at the base of permafrost also indicate the permeability-reducing nature of the permafrost interval (Hornum et al., 2020). In geological terms, permafrost is very short-lived which, in addition to being very shallow and potentially patchy, would typically preclude it from being regarded as a feasible seal for conventional hydrocarbon accumulations at geological time-scales of millions of years.

In Svalbard, methane migrating through near-coastal pingos shows characteristics of a biogenic origin (Hodson et al., 2019). Approximately three kilometres inland, analysis of gas encountered at the base of permafrost during drilling indicated a further contribution from thermogenic origins (Ohm et al., 2019). Several hydrocarbon source rocks are encountered in Svalbard, so traces of thermogenic gas are not particularly surprising. What is surprising, and the focus of this study, is the widespread occurrence, both spatially and stratigraphically, of gas accumulations at the base of permafrost in Svalbard. In this contribution, we therefore provide previously unpublished data from 41 boreholes to provide a systematic review of the occurrence of sub-permafrost gas accumulations from Svalbard. We also analyse data from these boreholes to attempt to characterise the permafrost, its thickness and sealing properties.

## 2 Geological and physiographic setting

The Svalbard archipelago is situated in the high arctic between 74° to 81°N and 15° to 35°E with sub-zero average temperatures for eight months of the year. Despite this, due to repeated glaciations and the warming effects of the West Spitsbergen Current, permafrost in Svalbard is not as thick as some other pan-arctic regions (Humlum, 2005).

Permafrost in Svalbard ranges in thickness from more than 500 m in mountainous areas inland and thins to less than 100 m near the coastlines (Humlum, 2005). Continuous sub-sea permafrost has not been shown to exist offshore on Spitsbergen's west coast (Christiansen et al., 2010) and is not believed to be present offshore elsewhere around Svalbard (Humlum et al., 2003; Landvik et al., 1988), although these areas have been little studied in this respect and may feature locally discontinuous permafrost. Because of the West Spitsbergen Current, temperatures are much warmer on the west coast than the east. Although poorly studied in eastern parts, one can reasonably anticipate thicker permafrost due to colder temperatures, as is also shown by numerical modelling of the permafrost-associated gas hydrate stability zone (Betlem et al., 2019). However, thicker insulating snow coverage in coastal settings can also help in preventing winter heat loss from the ground and limit permafrost growth (Humlum et al., 2003). In a more local context, permafrost in Adventdalen has been relatively well studied with near-zero thickness on the coast rapidly thickening to approximately 150 m thick 3 km inland at the Longyearbyen CO<sub>2</sub> site and approximately 220 m thick in the valley at Janssonhaugen, some fifteen kilometres from the coast (Isaksen et al., 2000; Harada and Yoshikawa, 1996; Gilbert et al., 2018).

The permafrost history of Svalbard is something of a contentious issue but it is important to understand as it provides clues to the timing and rate of gas accumulation at its base. The driver for the permafrost evolution in Svalbard is dependent on glacial settings rather than temperature changes. During the Weichselian glacial stage (115 kya to 11.7 kya) Svalbard was covered by thick glacial ice, although the extent and thickness of this ice cover is still debated (e.g. Gataullin et al., 2001; Lambeck, 1996; Winsborrow et al., 2010). Glacial striations in several locations suggest that these glaciers were warm-based for at least parts of the Weichselian glaciation (Humlum, 2005; Humlum et al., 2003). The frictional heat generated from the sliding of warm-based glaciers likely thawed permafrost in major valleys (Humlum et al., 2003). Sedimentological and cryostratigraphic analysis of boreholes in Adventdalen support this (Gilbert et al., 2018), suggesting permafrost here has formed in the past few thousand years following the dynamic retreat of these warm-based glaciers and ice streams. Whether permafrost survived the Weichselian glaciations is dependent on the persistence of ice-free zones and/or cold based glaciers. Because of this, permafrost in highland areas was more likely to have survived, possibly for several hundred thousand years, through multiple glacial events (Humlum et al., 2003). There is also strong evidence of lowland areas in north-western Svalbard being ice-free at this time which may have enabled the persistence of much older permafrost (Landvik et al., 2003). Valley settings are pertinent to this study as the majority of wellbores have been drilled in valleys or near to the coast for logistical reasons.

Permafrost often poses a challenge to geologists, particularly for drilling boreholes (Vrielink et al., 2008), and acquiring and processing seismic data (Schmitt et al., 2005; Johansen et al., 2003). This is because it changes the properties of shallow unlithified sediments to become much more rigid and cemented by ice. Therefore, the

permafrost interval has much faster seismic velocities and can lose mechanical competence as it is drilled through with heated or saline fluids. The near-surface rocks in Svalbard are typically well cemented and very rigid due to deep burial and subsequent uplift.

Many classic pf reference you cite are for unconsolidated sediments.. your setting is v. different - this points to a missing discussion on petrophysics... what type of cement, what ranges in porosity and permeability, etc. etc. and how are your 'well cemented and very rigid' bedrock occurrences expected to behave at negative temperatures- the readers of this journal will want to know this.

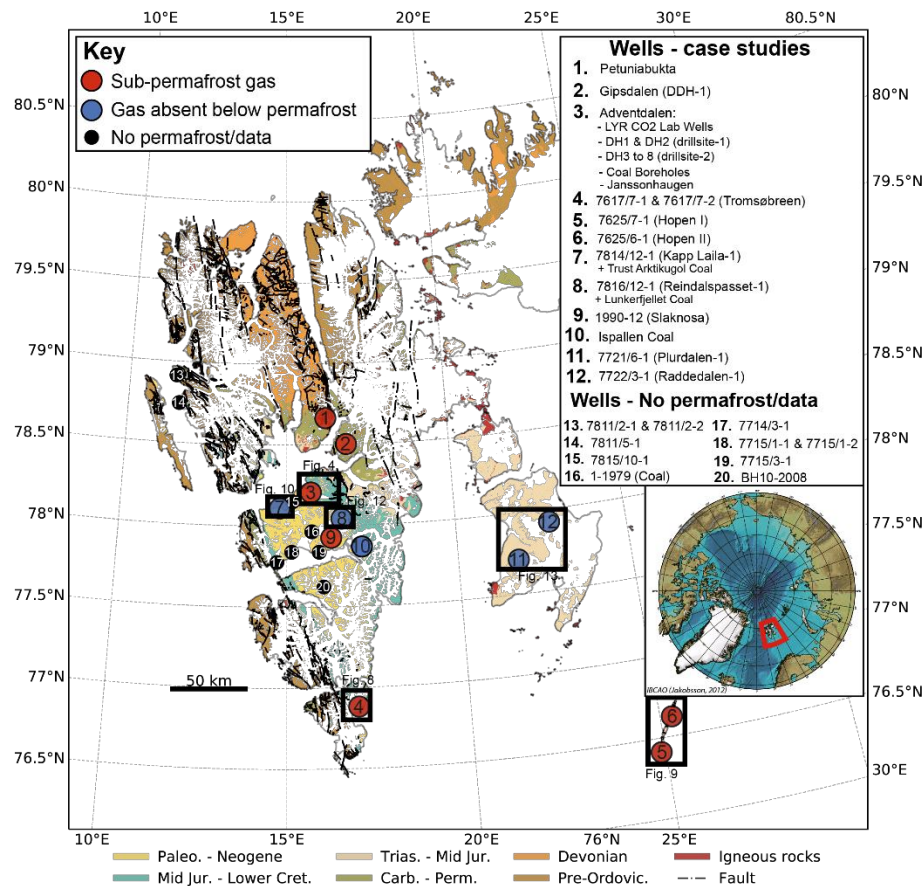

This figure is v. weak; -text is hard to decipher -numbering is almost impossible to decipher -legend for bedrock cites age, but for this paper the reader is interested in lithology

**Figure 1 – Map of Svalbard with boreholes and areas of interest investigated in this study. Geological data is courtesy of Norwegian Polar Institute (Dallmann et al, 2015). The locations of maps shown in later figures are highlighted.**

This paragraph is of marginal interest to pf considerations.. for considerations of ice bonding and seal capacity we need to know the lithologies and associated petrophysics

In a tectonic context, Svalbard represents the exposed north-western part of the Norwegian Barents Sea continental shelf. Other than the upper Cretaceous and parts of the Neogene, Svalbard exhibits a continuous stratigraphic record from the Devonian to present (Steel and Worsley, 1984). Figure 1 shows the distribution and ages of outcrops in Svalbard and the key wellbore sites for this study. Palaeozoic events from the Caledonian (Gasser, 2014) and Ellesmerian-Svalbardian (Piepjohn, 2000) orogenies are predominantly recorded in the remote northern parts of Svalbard. From the Late Carboniferous to Permian, mixed shallow marine rocks were deposited in local basins (Smyrak-Sikora et al., 2019; Bælum and Braathen, 2012). From the Triassic to Early Cretaceous, clastic deposition occurred in regional-scale basins (Steel and Worsley, 1984). The drainage pattern changed from the west in the Early Triassic to the east from the Middle Triassic. During this time Svalbard sat on the peripheries if the largest recorded delta system in Earth's history (Anell et al., 2014; Klausen et al., 2019; Mørk, 2013). The latest Triassic to middle Jurassic saw much less sedimentation with numerous hiatuses and changes in drainage (Olaussen et al., 2018; Rismyhr et al., 2019). The late Jurassic to early Cretaceous saw greater deposition, including regionally important source rock intervals, and change in drainage due to the

opening of the Amerasian Basin (Dypvik and Zakharov, 2012; Koevoets et al., 2018). During the Early Cretaceous the development of the High Arctic Large Igneous Province is evident from predominantly mafic dykes and sills in Svalbard (Senger et al., 2014). This likely resulted in major erosion during the late Cretaceous and early Palaeocene (Jochmann et al., 2019).

In Svalbard and the rest of the Barents Shelf, the Cenozoic geological history is the most important to understand subsurface fluid flow. In Svalbard, the Eocene was the time of maximum burial (Dörr et al., 2018), while in much of the Barents Sea maximum burial and hydrocarbon generation was probably during the late Oligocene to early Miocene (Henriksen et al., 2011; Faleide et al., 1996). From the Eocene to present major regional uplift of 1 to 3 km has occurred and is ongoing with Svalbard experiencing the greatest uplift magnitudes, hence being subaerially exposed (Dimakis et al., 1998; Lasabuda et al., 2018). For this study, the most pertinent tectonic events are of widespread uplift and erosion due to repeated glacial cycles of the past few million years (Dimakis et al., 1998; Landvik et al., 1998). These recent events are still ongoing, and are the most important with respect to the migration and leakage of hydrocarbons from deeper traps to the shallow subsurface (Ohm et al., 2008; Abay et al., 2017).

The prevalence of hydrocarbon shows and gas influxes throughout the stratigraphy can be attributed to the presence of multiple mature source rocks (Ohm et al., 2019). The marine shales of the Jurassic Agardhfjellet Formation of the Adventdalen Group and the Triassic Botneheia Formation of the Sassendalen Group are both regionally extensive and prolific source rocks, responsible for charging the majority of the oil and gas discoveries in the Norwegian Barents Sea. In addition, organic-rich shales in the Gipsdalen Group (Braathen et al., 2012) probably represent laterally restricted source rocks. Carboniferous, Cretaceous and Paleogene coal seams have been exploited in Svalbard's past, with the latter still being produced in the Central Tertiary Basin in Adventdalen and Barentsburg. These coal seams are widespread and are typically gas-prone and oil-prone source rocks (Marshall et al., 2015; Uguna et al., 2017).

Numerous sandstones and karstified carbonates provide potential reservoirs throughout Svalbard's stratigraphy, many of which are direct analogues to proven hydrocarbon reservoirs in the Barents Sea (Nøttvedt et al., 1993). For this study the most notable reservoirs are the shallow marine sandstone-dominated Lower Cretaceous Helvetiafjellet and Carolinefjellet Formations (Steel et al., 1981; Grundvåg et al., 2019), and the Triassic-Jurassic Kapp Toscana Group deltaic to shoreline deposited siltstone and sandstones (Mørk, 1999).

Again the rather extended discussion of petroleum history of source rocks is not linked to the goals of the paper.. this paragraph and proceeding ones could be considerably reduced

The above-mentioned source rocks are also the best candidates for sealing intervals. In addition, the mudstones of the late Palaeocene Basilika Formation and Palaeocene-Eocene Frysjaodden Formation also possess potential sealing properties (Steel et al., 1981). The numerous source rocks, technical oil and gas discoveries, bitumen stained strata and surface seeps suggest that Svalbard possesses working petroleum systems, though none of the eighteen exploration wells drilled onshore Svalbard from 1961 to 1994 resulted in commercially viable discoveries (Senger et al., 2019). Although hydrocarbon accumulations likely first formed tens of millions of years ago when source rocks were at maximum burial (Magoon and Dow, 2000), subsequent tectonic events have undoubtedly caused tertiary fluid migration (Abay et al., 2017; Ohm et al., 2008).

I find it disappointing to not have a review of the surficial/glacial geology and permafrost occurrence within

The most recent deglaciation of the Barents Ice Sheet from 15 to 10 kya probably caused tilting and hydrocarbon spillage from existing traps, furthermore glacial and overburden unloading resulted in remigration. Gas, particularly methane, is the dominant hydrocarbon found in Svalbard due to the prevalence of over-mature or gas-prone source rocks (Michelsen and Khorasani, 1991; Ohm et al., 2019; Senger et al., 2019) and active methanogenesis (Hodson et al., 2019). Deglaciation and uplift has reduced confining pressure on subsurface fluids and led to gas exsolution and expansion. Therefore, the subsurface fluid systems in Svalbard are in a state of disequilibrium and widespread hydrocarbon migration is likely ongoing at present (Abay et al., 2017). Evidence of this is manifested as out-of-equilibrium pore pressures (Birchall et al., 2020) and the previously mentioned surface seeps.

why not tell the reader what the observations are.... over pressure, under consolidation...

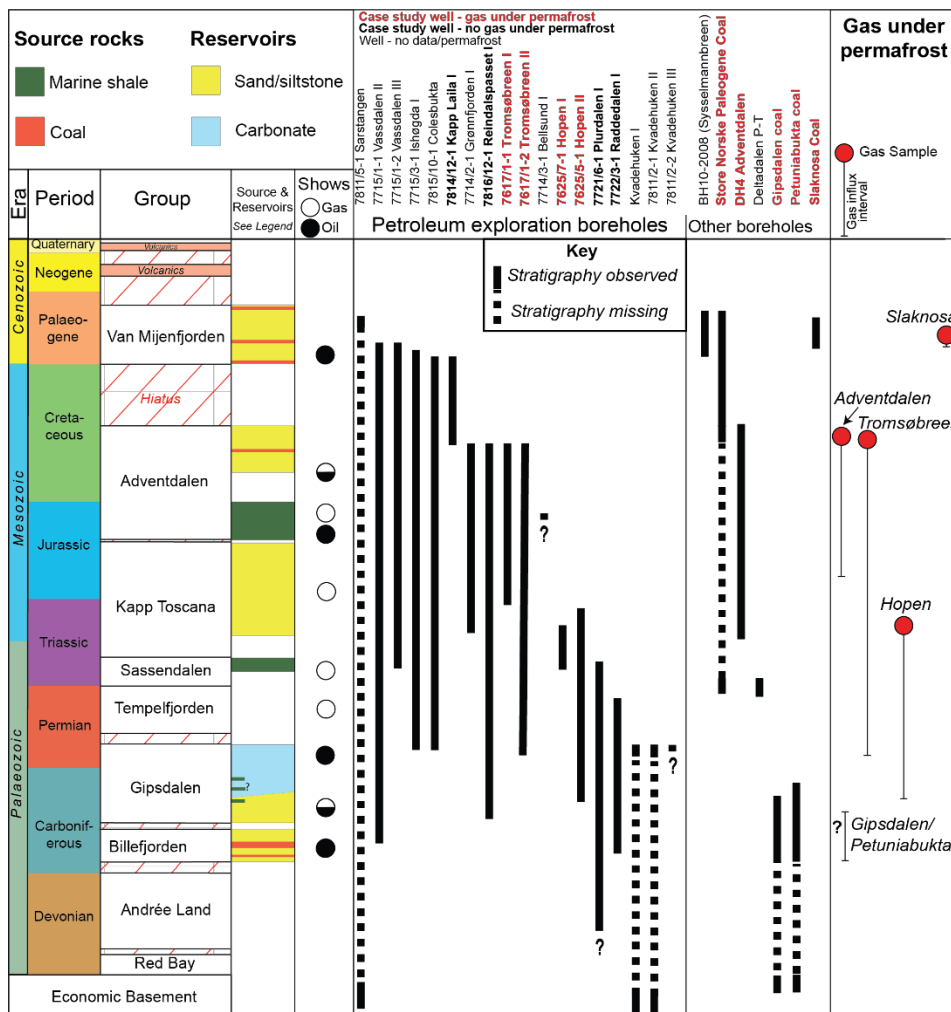

This figure is useful but rather frustrating for the reader  
 -text is v. small and may be illegible in final figure  
 -colour for source rock lithologies are similar to era and period ..delete colours for Era and Period...  
 -naming of wells is difficult to follow esp when cross referencing to map displays.. can naming be simplified?  
 -gas under permafrost with dot is shown for 4 wells, but the legend for case study wells shows 9 wells with gas under pf.. why are these not shown?

**Figure 2 – The hydrocarbon exploration wells of Svalbard and key coal and scientific boreholes showing the stratigraphy they penetrated, modified from Senger et al. (2019). The base-permafrost, gas-bearing stratigraphy is shown in the right hand column.**

In Svalbard, the timing of hydrocarbon migration and permafrost formation overlap, meaning there is potential for accumulations to develop beneath the impermeable permafrost. Although numerous hydrocarbon and coal exploration wellbores penetrate the entire permafrost interval, it has rarely been of interest to the operators (Senger et al., 2019). However, on detailed inspection of well data, reports, and anecdotal evidence, it is clear

that sub-permafrost gas accumulations have been frequently encountered throughout the archipelago. In Adventdalen, sub-permafrost free-gas was first documented in 1967 during coal exploration and encountered again in 1979 (Snsk, 1981). This accumulation was further confirmed, and sampled (Ohm et al., 2019; Huq et al., 2017), during scientific drilling of the Longyearbyen CO<sub>2</sub> Lab between 2008 and 2012. Figure 2 shows the key wellbores of this study, the stratigraphy they penetrate in Svalbard and whether they encountered gas at the base of permafrost, which is the main point of discussion in this contribution.

### 3 Data and methods

Several decades of coal and petroleum exploration, as well as research drilling, in Svalbard has led to much anecdotal evidence of gas accumulations beneath permafrost. We have attempted to verify this by analysing data from boreholes that have penetrated through the permafrost in Svalbard. These boreholes include eighteen hydrocarbon exploration wells, ten scientific boreholes, eight of which are from the Longyearbyen CO<sub>2</sub> Lab (from two drill sites). Also integral to this study are the somewhat sporadic data, including drilling and geological reports, from more than five hundred coal exploration boreholes drilled by the local Store Norske Spitsbergen Kulkompani (SNSK) over a period of nearly a century. We identify where gas accumulations occur and where these coincide with the base of permafrost, or the first permeable interval below it. One of the major challenges with these boreholes is that they typically target much deeper stratigraphy and often acquire very limited petrophysical data in the shallow parts. Typically, only the gamma ray logging tool, which measures the rocks natural radioactivity, is run in the shallow intervals. The available well data used in this study are presented in Table 1. Ascertaining the presence of sub-permafrost gas presents several challenges.

Identifying the presence of permafrost is simple and can often be clear from geomorphological features such as pingos. However, identifying the thickness and base of permafrost is much more challenging (Osterkamp and Payne, 1981). Table 2 shows the ideal responses of petrophysical and drilling data at the lower permafrost boundary and the challenges to each method. By far the biggest challenge to petrophysical and drilling data analysis in Svalbard is due to the low porosity, heterolithic, very rigid and overcompacted rocks (Henriksen et al., 2011). The nature of the base of permafrost itself is also not well understood, but it is a reasonable assumption that it is a diffuse boundary which adds to the complexity of identifying a permafrost boundary in petrophysical data alone. Further complications arise from the drilling fluid used and circulated in the wellbores which was often heated and hypersaline. Nevertheless, it is possible to identify the approximate base of permafrost on a case-by-case basis using all available data. Gamma ray logging lithology and drilling data is useful in identifying changes in the rock. However, it is not always obvious evidence of being below the ice-bearing zone (e.g. a change in salinity). Other indicators that can help identify the position of the base of permafrost are changes in the wellbore, sudden changes in the character or amount of gas-bearing returns and increases in background gas measurements. The strongest indication of base permafrost occurs where fluid influxes into or out of the wellbore suddenly occur in thick, normally permeable sandstones. In this situation it is very likely it is due to the transition of impermeable permafrost to permeable water or gas-bearing rock. Abnormally high pressures at the apparent base of permafrost are often mentioned in well reports and provide good evidence that the permafrost is acting as an effective seal.

I find pf interpretation with just variations water flux or in permeability to be v. weak. It would be much stronger if you had at least one other measurement to confirm

| Petrophysics - Start of Data (m MD) |                      |                |          |         |             | Gas Data                |                           |                |             |
|-------------------------------------|----------------------|----------------|----------|---------|-------------|-------------------------|---------------------------|----------------|-------------|
| Well                                | Gamma Ray            | Resistivity    | Acoustic | Density | Temperature | Cuttings                | Gas Shows (Chromatograph) | Fluid Samples  | Well Report |
| Hydrocarbon Exploration             |                      |                |          |         |             |                         |                           |                |             |
| 7617/7-1 Tromsøbreen-1              | (Drilling parameter) |                |          |         |             |                         |                           |                | Y           |
| 7617/7-2 Tromsøbreen-2              | 17                   | 350            |          |         |             |                         |                           |                | Y           |
| 7625/7-1 Hopen-1                    | 3.5                  | - (SP logged)  | -        | -       | BHT         | Surface                 | Surface                   | c. 150 m       | Y           |
| 7625/6-2 Hopen-2                    | Surface              | 349            | 349      | 638     | Surface     | Surface                 | Surface                   | -              | Y           |
| 7714/2-1 Grønnefjorden              | not logged           |                |          |         |             | Cored                   | -                         | -              | Y           |
| 7714/3-1 Bellsund                   | ?                    |                |          |         |             |                         |                           |                | N           |
| 7715/1-1 Vassdalen-2                | Surface              | 17             | -        | -       | -           | -                       | -                         | -              | N           |
| 7715/1-2 Vassdalen-3                | -                    | -              | -        | -       | -           | -                       | -                         | -              | N           |
| 7715/3-1 Ishøgda                    | Surface              | Surface        | Surface  | Surface | Surface     | Surface                 | -                         | -              | N           |
| 7721/6-1 Plurdalen                  | 5                    | 83             | 5        | 83      | Surface     | Surface                 | Surface                   | Water at 500 m | Y           |
| 7722/3-1 Raddalen                   | Surface              | 5              | 591      | 593     | 5           | Surface                 | Surface                   | -              | Y           |
| 7811/2-1 Kvadehukken-1              | not logged           |                |          |         |             | Cored                   | -                         | -              | N           |
| 7811/2-2 Kvadehukken-2              | not logged           |                |          |         |             | Cored                   | -                         | -              | N           |
| - Kvadehukken-0                     | Shallow, no data     |                |          |         |             |                         |                           |                |             |
| 7811/5-1 Sarstangen                 | 30                   | 615            |          |         | BHT         | Surface                 | 260m                      | -              | Y           |
| 7814/12-1 Kapp Laila                | Surface              | - (SP logged)  |          |         |             | 24 m (partial recovery) |                           |                | Y           |
| 7815/10-1 Colesbukta                | Surface              | 41             | 1467     | -       | -           | -                       | -                         | -              | N           |
| 7816/12-1 Reindalspaset             | From surface         | 22 (induction) | 22       | 22      | 17.4        | Surface                 | 20 m                      | -              | Y           |
| Selected Coal Boreholes             |                      |                |          |         |             |                         |                           |                |             |
| 1967-1 Adventdalen                  |                      |                |          |         |             |                         | Y                         | -              | Y           |
| 1979-10 Adventdalen                 | Cored (not logged)   |                |          |         |             |                         | -                         | -              | Y           |
| 1979-11 Adventdalen                 |                      |                |          |         |             |                         | -                         | -              | Y           |

It is not possible to fully interpret this table...the formatting is sloppy and it is not clear what the numbers mean, the term surface, etc. ? please add interpreted base of permafrost for each well?

|                                                  |                    |  |  |  |  |   |   |                                                                                                       |
|--------------------------------------------------|--------------------|--|--|--|--|---|---|-------------------------------------------------------------------------------------------------------|
| DDH1B<br>Gippsdalen<br>1982-20                   |                    |  |  |  |  | - | - | Y                                                                                                     |
| Gruve 7 -<br>H1<br>1981-02                       | No data            |  |  |  |  | Y | - | 1982<br>drilling<br>summa<br>ry<br>1979<br>drilling<br>summa<br>ry<br>1981<br>drilling<br>summa<br>ry |
| 1981<br>(Platåberget<br>)<br>1981-05<br>Breinosa |                    |  |  |  |  | - | - | 1981<br>drilling<br>summa<br>ry<br>1981<br>drilling<br>summa<br>ry                                    |
| 1981-06<br>Breinosa                              | Cored (not logged) |  |  |  |  | - | - | 1981<br>drilling<br>summa<br>ry                                                                       |
| 1979-1<br>Reindalen                              |                    |  |  |  |  | - | - | Y                                                                                                     |
| 1990-12<br>Slaknosa                              |                    |  |  |  |  | - | - | Y                                                                                                     |
| Scientific Boreholes                             |                    |  |  |  |  |   |   |                                                                                                       |

|                                        |                   |     |     |             |         |       |   |                                  |
|----------------------------------------|-------------------|-----|-----|-------------|---------|-------|---|----------------------------------|
| DH1                                    | 3                 | 3   | 9   | -           | Surface | Cored | - | Y                                |
| DH2                                    | 10                | 10  | 10  | -           | Surface | Cored | - | Y                                |
| DH3                                    | Cored: not logged |     |     |             |         | Cored | - | Y                                |
| DH4                                    | Surfac<br>e       | 440 | 440 | -           | Surface | Cored | - | Through<br>out<br>Below<br>645 m |
| DH5r                                   | 3                 | -   | 100 | -           | Surface | Cored | - | Y                                |
| DH6                                    | Cored: not logged |     |     |             |         | Cored | - | Y                                |
| DH7a                                   | Cored: not logged |     |     |             |         | Cored | - | Below<br>645 m                   |
| DH8<br>(Shallow)                       | Cored: not logged |     |     |             |         | Cored | - | Y                                |
| BH10-2008                              | Surfac<br>e       | 67  | 48  | Surfac<br>e | -       | -     | - | Y                                |
| Janssonhau<br>gen<br>(temperatur<br>e) | -                 | -   | -   | Surface     | -       | -     | - | N                                |

**Table 1 – Data availability and intervals recorded for the permafrost penetrating boreholes.**

Poorly worded.. thermometer.. or thermistors? direct measurement of mud temp or in situ measurement of ground temperature?

Direct temperature data from thermometers used in conjunction with wireline logging tools is common from hydrocarbon exploration wells. However these were rarely allowed to reach thermal equilibrium with the surrounding formations following drilling and fluid circulation. Therefore accurate absolute temperature measurements are rare, though temperature trends (e.g. inflection points) can be used more qualitatively to estimate base permafrost. Wells monitored over longer time periods, such as the scientific boreholes in

Adventdalen (Isaksen et al., 2000; Olaussen et al., 2019; Juliussen et al., 2010) are relatively rare, but provide much more reliable and precise temperature data.

Identifying the presence of gas is relatively simple and, although petrophysical data is generally not helpful in shallow sections for fluid discrimination. Reliable evidence comes from influxes of gas into the wellbore which has been sampled from wells in Adventdalen, Tromsøbreen and Hopen (Senger et al., 2019). Elevated background gas is another good indicator of sub-permafrost gas and is measured in drilling fluids returning to the surface and extracted by a “gas trap”. This method typically identifies in-place dry gas accumulations or gas that has exsolved from fluid on its way to the surface due to pressure decline. However, these measurements do not detect gas that remains dissolved in formation water. Gas from drilling mud is also impacted by a variety of factors (Marum et al., 2019), including drilling rate, drilling mud type and, perhaps the most pertinent, temperature; low temperatures can cause heavier hydrocarbons to condense and avoid detection, it also causes drilling fluids to become more viscous, further inhibiting gas extraction.

| Log Type                   | Property Measured (Units)                                                                | Idealised Permafrost Response                                                                        | Complicated by                                                                                                                                              |
|----------------------------|------------------------------------------------------------------------------------------|------------------------------------------------------------------------------------------------------|-------------------------------------------------------------------------------------------------------------------------------------------------------------|
| <b>Petrophysical Data</b>  |                                                                                          |                                                                                                      |                                                                                                                                                             |
| <b>Gamma Ray</b>           | Radioactivity of rocks (API)                                                             | No Response but useful in determining lithology.                                                     | N/A                                                                                                                                                         |
| <b>Acoustic (Sonic)</b>    | Seismic velocity of rocks and fluids within. Measured in slowness (microsecond per foot) | Faster velocities (lower slowness) in icebound intervals.                                            | Overcompacted, dense and rigid rocks.<br>Low porosity and heterolithic rocks.                                                                               |
| <b>Resistivity</b>         | Resistivity of rocks and fluids within.                                                  | High resistivity in permafrost becoming low in water bearing interval.                               | Resistive hydrocarbons below permafrost.<br>Fresh water below.<br>Low porosity rocks.<br>Clay rich and heterolithic rocks.                                  |
| <b>Density</b>             | Density of rocks and fluids within.                                                      | Decreased density in ice-bearing intervals                                                           | Low porosity.<br>Heterolithic rocks (fluid response is generally overwhelmed by lithological response).                                                     |
| <b>Temperature</b>         | Temperature of fluid in borehole at a given depth.                                       | 0°C or lower in permafrost interval.                                                                 | Measures wellbore fluid, not fluid within formation.<br>Drilling fluid circulates and is often heated.<br>Requires a long time to equilibrate to formation. |
| <b>Fluid Sampling</b>      | Pressure and fluid properties.                                                           | Qualitative - shows fluid phase and type.<br>Abnormal pressures indicate a vertical barrier or seal. | Low permeability (including permafrost ice).<br>Limited to few points in well.<br>Shallow samples rarely of interest.                                       |
| <b>Drilling Parameters</b> |                                                                                          |                                                                                                      |                                                                                                                                                             |

|                                  |                                                                                                                                                 |                                                                                                                                             |                                                                                                                       |
|----------------------------------|-------------------------------------------------------------------------------------------------------------------------------------------------|---------------------------------------------------------------------------------------------------------------------------------------------|-----------------------------------------------------------------------------------------------------------------------|
| <b>Fluid Influx</b>              | Fluid entering wellbore (often flowing to surface)                                                                                              | Indicates transition from impermeable to permeable zone.                                                                                    | Exact depth of influx is uncertain.                                                                                   |
| <b>Background Gas</b>            | Measures levels and composition of gas returned with drilling fluid at the surface. Does not measure dissolved gas. (Percentage or parts per x) | Indicates transition from impermeable to permeable zone.                                                                                    | Varies depending on drilling rate, permeability, drilling mud type. Exact depth/formation of gas origin is uncertain. |
| <b>Rate of Penetration (ROP)</b> | The rate the drill bit penetrates the ground (ft. or m per hour)                                                                                | A rapid rise in rate of penetration when transitioning from ice-bound to unbound rock. Best used with Weight-on-bit (1000 lbs) measurement. | Well-cemented, compacted and hard rocks. Rate can depend on external factors including drill bit condition.           |
| <b>D-exponent</b>                | Extrapolation of numerous drilling parameters to estimate pore-pressure.                                                                        | May identify anomalously high drilling rate (or pressure) at base permafrost.                                                               | Well cemented, compacted and hard rocks. Heterolithic rocks. Largely qualitative.                                     |

**Table 2 – The petrophysical and drilling parameters that may identify permafrost and its base. Idealised responses are shown and typically identify the transition from ice to water. The final column shows the complicating factors, all of which are applicable to Svalbard. Perhaps the most pertinent complication to Svalbard is that the geology is comprised of well cemented, compacted, hard rocks.**

In addition to well data, we also include data from published scientific studies including isotope (Huq et al., 2017), thermobaric (Isaksen et al., 2000; Betlem et al., 2018; Betlem et al., 2019), geophysical (Beka et al., 2017; Johansen et al., 2003) and geochemical (Leythaeuser et al., 1984; Ohm et al., 2008) analyses. We also analysed Russian published literature for areas operated by Trust Arktikugol (Lyutkevich, 1937; Verba, 2013).

For Adventdalen, Tromsøbreen and Hopen we integrated all relevant data (summarised in Betlem et al., in review; and references therein) in order to calculate the gas hydrate stability zone and permafrost extent for the targeted study areas according to the workflow outlined in Betlem et al. (2019) and further refined in Betlem et al. (in review). The workflow assumes steady-state conditions and implements structure-I gas hydrate phase boundary curves generated through the HWHYD modelling software (Masoudi and Tohidi, 2005).

## 4 Results

### 4.1 Evidence of Permafrost

Figure 3 shows which boreholes encounter permafrost, their elevation, and the depth to the base of permafrost. Although it does not preclude its existence, there is no clear evidence of permafrost in the hydrocarbon exploration wells on the west coast. On the shoreline of Isfjorden, the Kapp Laila and Adventdalen (DH1 and DH2) wells show evidence of a thin permafrost interval, although it may not be ice-bearing. Wells on the east coast of Spitsbergen at Tromsøbreen and on the southern beach of Hopen provide strong evidence of a thicker permafrost top seal even in coastal locations. Wells further inland, including the majority of coal exploration boreholes, unsurprisingly show evidence of thicker permafrost.

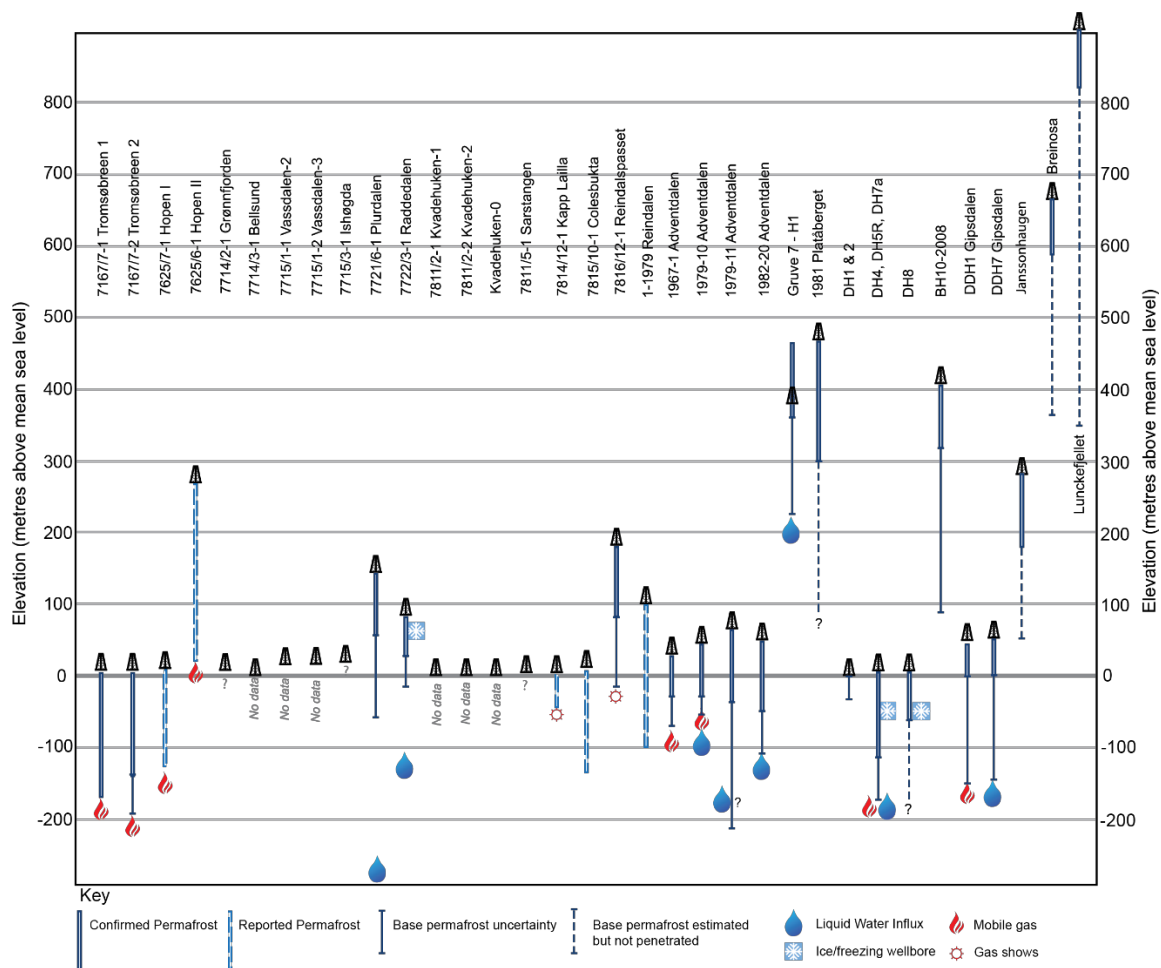

What is the difference between a gas show and mobile gas?

**Figure 3 - A plot of wells in this study showing their elevation and the depth to base permafrost. Solid well path outlines show where data analysed in this study confirms the presence of permafrost while dashed outlines represent where base permafrost has been reported but data is not available. For the Breinosa wellbore, which shows -7.8° at its coldest point at 78 m (and a TD at 90 m) (Juliussen et al., 2010), we extrapolated the base permafrost the local geothermal gradient of 35°/km (Betlem et al., 2018; Isaksen et al., 2000). Borehole locations are shown in Fig. 1.**

Table 3 shows occurrences of where gas has and has not been encountered at the permafrost base. The wells in Adventdalen, Tromsøbreen, Hopen and Gipsdalen all indicate gas accumulation at the base of permafrost and all but the latter are discussed in detail here. Reindalen, Kapp Laila and the Plurdalen and Raddedalen wells on Edgeøya are also of particular interest and discussed further because they show good evidence of permafrost, but do not appear to encounter gas accumulations below it.

in Fig above you use the terms mobile gas and gas shows... here you use evidence for gas and tentative/shows. None of these terms are well described

| Well                           | Evidence for Gas Under Permafrost | Tentative/Shows | Permafrost but no gas |
|--------------------------------|-----------------------------------|-----------------|-----------------------|
| <b>Hydrocarbon Exploration</b> |                                   |                 |                       |
| 7617/7-1 Tromsøbreen-1         | •                                 |                 |                       |
| 7617/7-2 Tromsøbreen-2         | •                                 |                 |                       |
| 7625/7-1 Hopen I               | •                                 |                 |                       |
| 7625/6-1 Hopen II              | •                                 |                 |                       |

|                             |                                 |
|-----------------------------|---------------------------------|
| 7714/2-1 Grønnfjorden       |                                 |
| 7714/3-1 Bellsund           |                                 |
| 7715/1-1 Vassdalen-2        |                                 |
| 7715/1-2 Vassdalen-3        |                                 |
| 7715/3-1 Ishøgda            |                                 |
| 7721/6-1 Plurdalen          | •                               |
| 7722/3-1 Raddedalen         | •                               |
| 7811/2-1 Kvadehuken-1       |                                 |
| 7811/2-2 Kvadehuken-2       |                                 |
| Kvadehuken-0                |                                 |
| 7811/5-1 Sarstangen         |                                 |
| 7814/12-1 Kapp Laila        | •                               |
| 7815/10-1 Colesbukta        |                                 |
| 7816/12-1 Reindalspasset    | •                               |
| <i>Coal</i>                 |                                 |
| 1967-1 Adventdalen          | •                               |
| 1979-10 Adventdalen         | •                               |
| 1979-11 Adventdalen         | •                               |
| 1982-20 Adventdalen         | •                               |
| Gruve 7 - H1 Adventdalen    | •                               |
| DDH1B Gippsdalen            | •                               |
| 1979-1 Reindalen            | •                               |
| 1981 Platåberget            |                                 |
| 1981-Breinos                |                                 |
| Lunckefjellet               | <i>TD above base permafrost</i> |
| Ispallen                    |                                 |
| 1990-12 Slaknosa            | •                               |
| <i>Scientific Wellbores</i> |                                 |
| DH1                         |                                 |
| DH2                         |                                 |
| DH3                         |                                 |
| DH4                         | •                               |
| DH5r                        | •                               |
| DH6                         |                                 |
| DH7a                        |                                 |
| DH8 (Shallow)               |                                 |
| BH10-2008                   | •                               |
| Janssonhaugen               | <i>TD above base permafrost</i> |

Table 3 – Wells showing where gas is and is not present at the base of permafrost. Wells without a bullet either contain no permafrost or no relevant data.

## 4.2 Case Studies: confirmed sub-permafrost gas

### 4.2.1 Adventdalen

Svalbard's largest settlement, Longyearbyen, is located in Adventdalen (Fig. 4), and one of the better studied areas of Svalbard (Hodson et al, 2020; Hornum et al, 2020; Johansen et al., 2003; Beka et al., 2017; Olaussen et al., 2019 and references therein). The wells of the Longyearbyen CO<sub>2</sub> Lab and coal exploration boreholes of SNSK both show the presence of gas beneath the permafrost in Adventdalen (Fig. 5) provides a correlation panel of these wellbores.

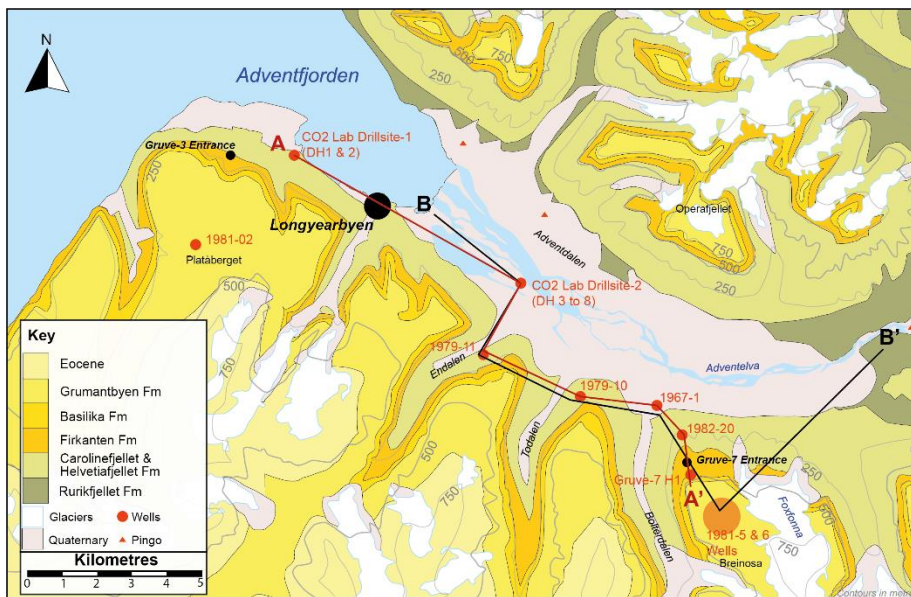

**Figure 4 - A Geological Map of Adventdalen showing some of the youngest stratigraphy exposed in Svalbard. The profile A to A' represents the well correlation in Fig. 5 and B to B' the modelled permafrost profile in Fig. 6.**

At the near-coast drillsite-1 of the Longyearbyen CO<sub>2</sub> Lab wells temperature data from DH1 and DH2 indicate a thin permafrost interval with the base at approximately 20-30 m (Beka et al., 2017). Although sub-zero temperatures were recorded at this site, the presence of ice is strongly dependent on the pore-fluid salinity. At drillsite-2, wellbores DH3 and DH4 encountered overpressured water at the base permafrost. DH4 and DH5R also encountered significant natural gas with this water kick and it was collected in gas bags for sampling (Ohm et al., 2019; Huq et al., 2017). Temperature logs from well DH4 suggest base permafrost from 150 to 200 m depth but given the drilling fluid losses and mud circulation there is considerable uncertainty in this data. Cores from nearby wells DH6 and DH7A also show elevated methane levels at this depth. The water and gas influxes occur somewhere towards the middle (i.e. not top of the reservoir) of the sandstone dominated Helvetiafjellet Formation. Figure 6 is the modelled permafrost thickness in Adventdalen which shows good agreement with the independent well data observations.

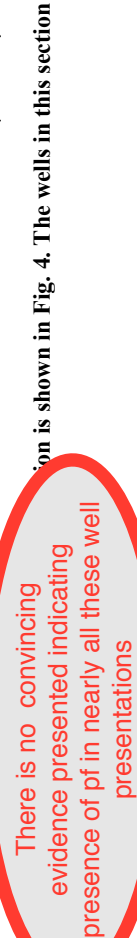

Figure 5 – A Well correlation of base permafrost with all available geological, drilling and geophysical data is shown in Fig. 4. The wells in this section highlight the somewhat sporadic nature of data availability over the shallow, permafrost-free zone. There is no convincing evidence presented indicating presence of pf in nearly all these wells.

In the same area, hundreds of coal boreholes, drilled by SNSK over the decades, have penetrated the permafrost interval, although data for these is more fragmented. Well 1979-11 was drilled approximately two kilometres south of Longyearbyen CO<sub>2</sub> Lab drillsite-2 in Endalen. This well encountered water influxes with no mention of gas, although no depths are stated in the report (Snsk, 1980, 1981). Well 1979-10, two kilometres to the southeast in the neighbouring valley Todalen encountered methane-rich gas overlying inflowing water at the base of permafrost at a depth between 150 to 200 m (Snsk, 1981, 1982b; Leythaeuser et al., 1984). Well 1967-1, approximately three kilometres east and geologically updip of 1979-10, reached a depth of 106 m where a gas accumulation was encountered (Snsk, 1981). This well was also the subject of considerable interest by SNSK who investigated the potential of producing the gas commercially. Well 1982-20, approximately one kilometre southeast of 1967-1, at the base of Breinosa and the coal mine Gruve-7, did not encounter gas and took water influxes of 33-42 litres per minute at approximately 150 m at the base of permafrost (Snsk, 1982a). Another reported well, named only “first water well”, (Snsk, 1982a) in the same area flowed from the same interval at 40-50 litres per minute. Water from these two wells had a measured chloride concentration of 1500 ppm (Snsk, 1982a). A well drilled inside Gruve-7 at approximately 380 m AMSL encountered liquid water at 154 m depth.

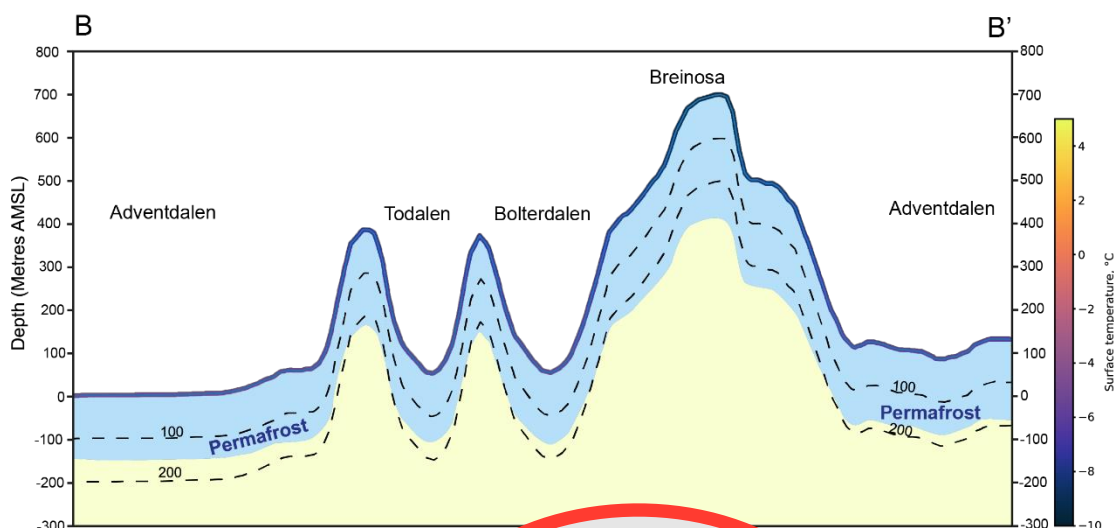

**Figure 6 - Modelled permafrost thickness** parameters are discussed in the method rather than ice thickness or presence. The model is entirely based on temperature

Well 1967-1 and 1979-10 most likely permafrost over the same stratigraphic interface. Intermittent flow from the well between October 1967 and July 1975 (Snsk, 1981). The first year of this production was continuous and monitored as shown in Fig. 7A. An initial wellhead gas pressure of 14 bar was recorded (Snsk, 1981) with relatively slow pressure and production decline over time. This indicates the gas accumulation is in the order of millions of cubic-metres and has well connected pressure support. If the aquifer pressure is known then the length of the methane gas column can be calculated from this pressure. It is clear the aquifer is not at hydrostatic pressure from the surface due to the repeated influxes and water flow from wells 1979-10, 1979-11 and in the CO<sub>2</sub> lab research boreholes. Unfortunately these pressures were not measured.

What depth was this test conducted at and how does this fit with interpretations of the base of permafrost?... I would delete this discussion

SNSK commissioned flow analysis work to be carried out on the 1967-1 well in July 1975 and the results of these two test runs are shown in Fig. 7B. Here it is clear the well responded to pressure drawdown. However, flow rates were still significantly lower than those recorded over the first year. Figure 7C shows the pressure build-up when the well was shut in (effectively closed from the atmosphere) between the two test runs. The quick return to pre-drawdown pressures indicates, somewhat unsurprisingly, a good natural pressure support in the well. Ultimately the gas here was deemed by Statoil, and consequently SNSK, to be an uneconomic accumulation locally trapped by permafrost (Snsk, 1981).

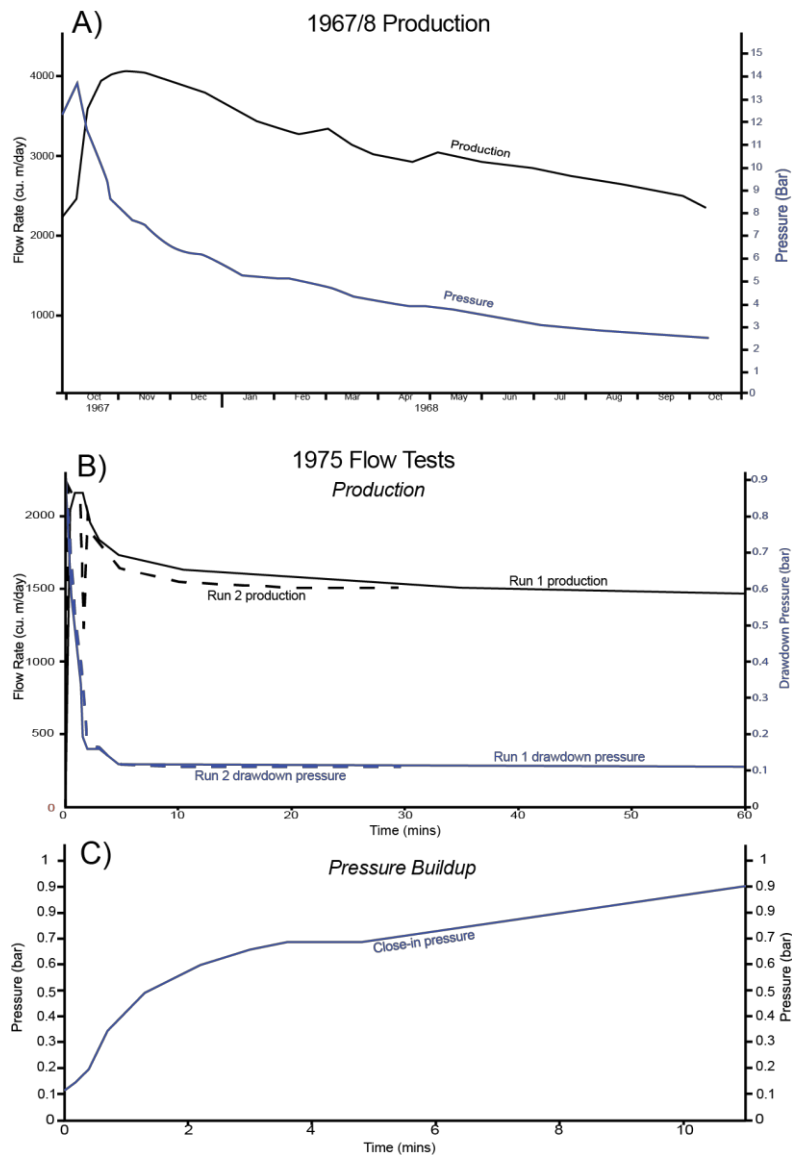

**Figure 7 – Production tests on the 1967-1 well in Adventdalen where was produced and flared. A) Gas production and pressure depletion for the first year of production. B) An oilfield-standard production test of production and pressure drawdown carried out by Statoil in 1975. The relatively fast flattening of the curves suggests stable flow and strong pressure communication in the reservoir. C) Pressure build up following shut-in of the well also indicating appreciable fluid communication.**

A drilling summary (Snsk, 1982a) documents two wells drilled at approximately 400 m above mean sea level (AMSL) on Platåberget, on the southern side of Adventdalen. They both report total drilling fluid losses at 160 -

170 m MD with no record of gas influxes. This is within the permafrost interval based on the presence of permafrost in the coal mine, Gruve-3, some 200 m below the surface. This demonstrates that the permafrost interval here is permeable. Similarly, on Breinosa, where the Gruve-7 mine is situated some fifteen kilometres to the east, wells 81-05 and 81-06 both encountered total fluid losses at a similar depth of 170m (Snsk, 1982a), well within the permafrost interval (Juliussen et al., 2010). The mine itself is situated entirely within the permafrost interval and has suffered from meltwater influxes from the overlying cold-based glacier, Foxfonna, on numerous occasions (Christiansen et al., 2005). Similar losses occurred in several intervals between 106 and 196 m in well 19-2011 on Operafjellet, a plateau on the northern side of Adventdalen (Snsk, 2011a). Freezing in the wellbore at 132 m indicates at least some, if not all, of these losses occurred in the permafrost interval.

Five pingos are situated along the northern edge of Adventdalen. Four of them provide active migration pathways through the permafrost leading to the discharge of brackish springs and high concentrations of methane (up to and marginally exceeding the solubility limit of 41 mg L<sup>-1</sup>) (Hodson et al., 2020). At the easternmost pingos, the chloride concentrations and the d<sup>13</sup>C isotopic composition of both the methane and dissolved CO<sub>2</sub> are remarkably similar to those described in the wellbore records above.

#### **4.2.2 Tromsøbreen**

Two hydrocarbon exploration wells, Tromsøbreen-1 (7617/1-1) and Tromsøbreen -2 (7617/1-2), were drilled at Haketangen in south-eastern Spitsbergen in 1977 and 1988, respectively. Both were drilled in nearly the same coastal location at 6 m AMSL, near the terminus of the Tromsøbreen glacier (Senger et al., 2019).

The wells primarily targeted the Jurassic-Triassic sandstones in an anticline trap mapped on the surface to the west (Fig. 8A) with the wells planned to be slightly deviated to intersect this at the prospect depth (Norsk Polar Navigasjon a/S, 1977b, a; Polargas Prospektering Kb, 1988). The outcrops in this area are predominantly the Carolinefjellet and Helvetiafjellet sandstones, though older stratigraphy outcrops to the west near the WSFTB hinterland. Unfortunately, gamma ray was the only petrophysical data acquired over the shallow intervals, though gas chromatography, drilling parameters and drilling and well reports provide a good indication of the subsurface.

Both wells suffered major drilling problems at the apparent base of permafrost at 179 m. The permafrost interval showed no permeability and in Tromsøbreen-1 took 45 days (the entire wellbore took 90 days) to successfully drill through (Norsk Polar Navigasjon a/S, 1977b). Both wells suffered major drilling fluid losses into the formation; this was measured in Tromsøbreen-1 at 150 to 200 barrels (24 to 32 cubic metres) of drilling mud (Norsk Polar Navigasjon a/S, 1977b). At the same time as drilling fluid was lost from the wellbores, gas influxes into the both wells also occurred. Indeed, measurements show significant natural gas from this point continuously until the Triassic stratigraphy including a gas kick at 960 m in Tromsøbreen-1. Immediately after the first gas influx lost circulation material was used to remedy drilling fluid losses. Lost circulation material is used to plug cavities in the formation to prevent further losses, it also renders the mud gas traps unusable over the interval it is used, as is shown by “LCM in mud” in Fig. 8B. The shallowest gas sample was taken at 768 m and comprised predominantly methane and is discussed later in this section. Gas observed throughout the

intervals of both wellbores was deemed by the operator as important enough to plan a third well approximately one kilometre to the north (Polargas Prospektering Kb, 1988), although it was never drilled.

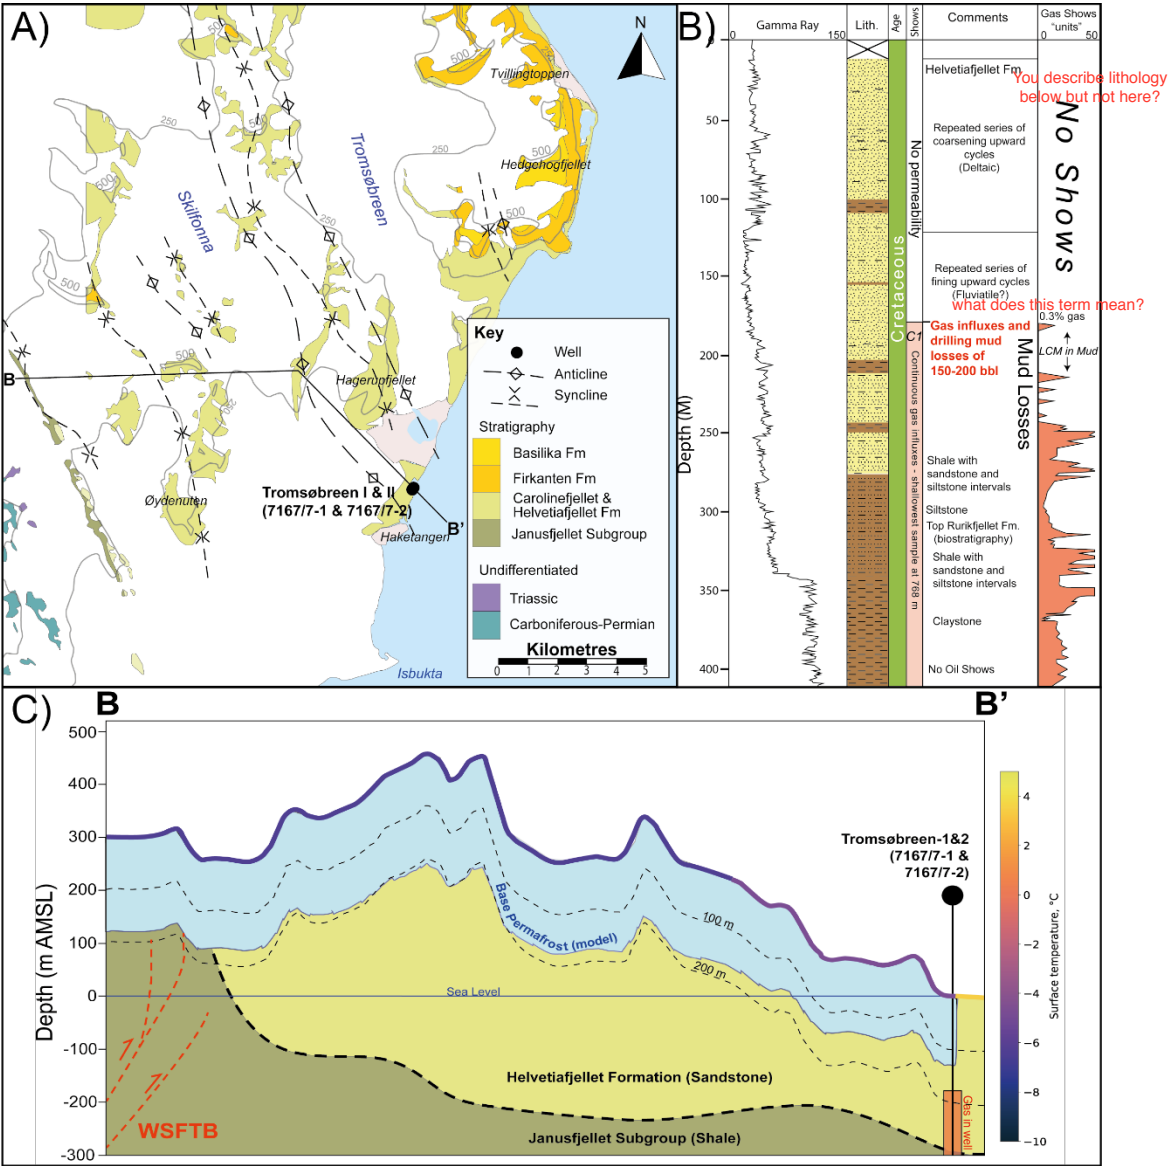

**Figure 8 – A) Geological map from Tromsøbrean redrawn from Birkenmajer et al. (1992). B) All available data over the shallow intervals at Tromsøbrean combined from the two wells. The petrophysical, lithological and gas data is from 7617/7-1 (Tromsøbrean I) while 7617/7-2 (Tromsøbrean II) recorded very little data over the shallow intervals, though did corroborate drilling fluid losses and gas influxes at the same depths. C) Cross-section (shown in A) of modelled permafrost thickness and the important reservoir and sealing formations, and inferred faults of the West Spitsbergen Fold and Thrust Belt (WSFTB) based on outcrop data (Birkenmajer et al, 1992).**

Based on bottom-hole temperatures in both wells, the Tromsøbrean area has an extremely high geothermal gradient, with averages for Tromsøbrean-2 suggesting 43°C/km and Tromsøbrean-1 indicating 52°C/km (Betlem et al., 2018). Fig. 8C shows a simple modelled permafrost thickness using this geothermal regime and surface temperatures. The apparent permafrost encountered in the wellbores has a discrepancy with the steady-state assumption model of approximately forty metres.

### 4.2.3 Hopen

The island of Hopen is 34 km long and 0.5-2.5 km wide and is comprised almost entirely of the heterolithic Triassic De Geerdalen Formation, which is approximately 650 m thick here (Lord et al., 2014). Two wells were completed on Hopen, Hopen-1 (7625/7-1) and Hopen-2 (7625/5-1), drilled in 1971 and 1973, respectively (Senger et al., 2019). Hopen is one of the few cases where the operator took interest in the sub-permafrost gas accumulation and sampled it. Hopen-1 was drilled on the southern beach while Hopen-2 was drilled in the highlands in the northern part of the island (Fig. 9).

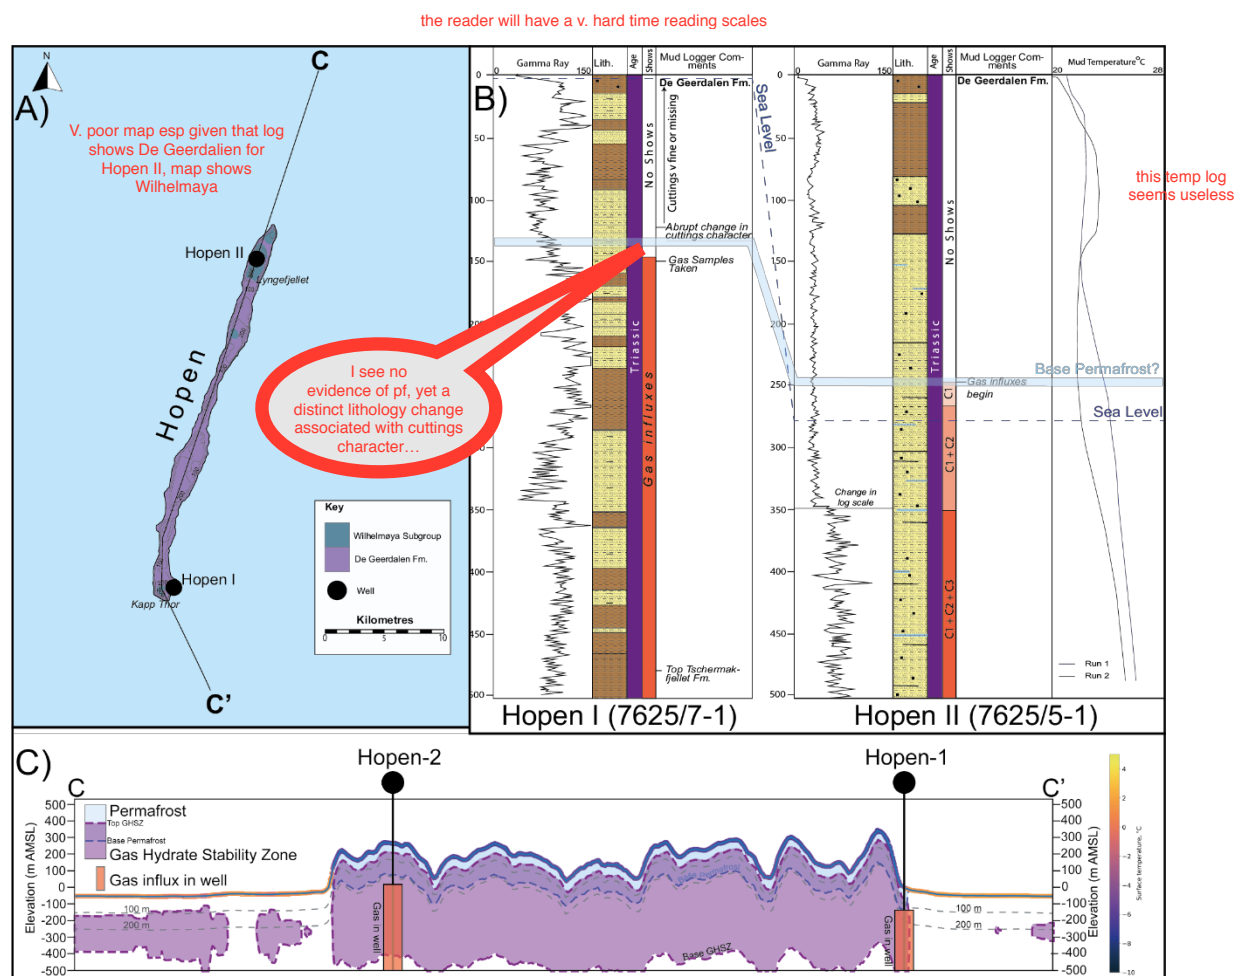

**Figure 9 – A) Geology and outline of the island of Hopen based on Lord et al. (2014) with the map location shown in Fig. 1). Profile C-C' is shown in C) B) Petrophysical and lithological information from the respective wells. Gas samples were taken in Hopen I while a chromatograph in the mud traps was used in Hopen II. The muted gamma ray response in the upper 350 m of Hopen II is probably due to the recording through casing. C) Cross sectional (shown in A) of Hopen showing the modelled permafrost and gas hydrate stability zones. Geology is not shown but the section comprises almost entirely of the heterolithic sand, siltstone and shales of the De Geerdalen Formation.**

Both wells sustained gas influxes attributed to the base of permafrost (Norske Fina a/S, 1971b, a, 1973b, a). In terms of petrophysical data, operations at Hopen-1 only acquired gamma ray data over the uppermost interval while Hopen-2 gathered gamma ray and temperature data. However, it is important to note that the wells also used heated drilling fluids to prevent freezing in the permafrost interval so absolute temperature values in this section are of limited use. Gas samples were taken in the Hopen-1 well from approximately 150 m while at

Hopen-2 a gas chromatograph was used in the drilling mud traps. Based on temperature data from these wells the geothermal gradient of Hopen is 25-34°C/km (Betlem et al., 2018).

Hopen-1 was drilled on the southern coast and encountered a gas kick at approximately 150 m which was deemed significant enough to be sampled. This gas is much heavier in composition than the gas encountered in Adventdalen and Tromsøbreen and is discussed later in this section. The wellsite geologist noticed an abrupt change in the cuttings characteristics, but not their lithological composition, at 138 m (Norske Fina a/S, 1971a) which was attributed to the base of permafrost. Gas was recorded from permafrost base to the bottom of the well at 908 m (Norske Fina a/S, 1971b, a).

Hopen-2 was drilled approximately 30 km further north on Lyngefjellet. Elevated gas readings in returning drilling mud were recorded from approximately 250 m (approximately 30 m AMSL) with no apparent changes in cutting lithology.

#### **4.2.4 Slaknosa and Kapp Amsterdam**

In 1990 SNSK's 399 m deep coal exploration wellbore 1990-12 encountered a gas blowout at around approximately 550 m AMSL on Slaknosa plateau on the southern edge of Reindalen (Snsk, 1991). The blowout exerted enough force to blow rocks, gravel and gas out of the wellbore. Little data remains from this wellbore and the exact interval of the gas kick is unknown although it was hypothesised to originate from fractured intervals having migrated from nearby coal seams.

Kapp Amsterdam is a cape close to the mining settlement of Svea. It is comprised of a glacial moraine approximately 600 years old (Kristensen et al., 2009). In 1986 a methane blowout occurred when drilling through these deposits at a depth of 33.5 m (Snsk, 1986). According to the drilling report, thermistors were placed in the wellbore with suggestion that permafrost was acting as a top seal (Snsk, 1986).

#### **4.2.5 Gipsdalen**

There are very limited data from Gipsdalen, but a single drilling summary report (Senger et al., 2019; Snsk, 1982b, 1979) shows that eight coal exploration wells were drilled in the area. One of these, DDH7, encountered overpressured water at the base of permafrost at 200 m in either Permian or Carboniferous rocks. The basis for determining base permafrost is not given but the report states a depth of 300 m was expected prior to drilling. Another well, DDH1, suffered a gas kick from the same apparent interval. The wellhead pressure from the water influx in DDH7 was 23 bar while no flow rates were recorded. If the aquifer overpressure is artesian, it equates to a hydraulic head at approximately 330 m AMSL which may correlate to recharge from heavily glaciated areas to the east.

## 4.3 Case studies: Permafrost present with no trapped gas

### 4.3.1 Kapp Laila and Colesbukta

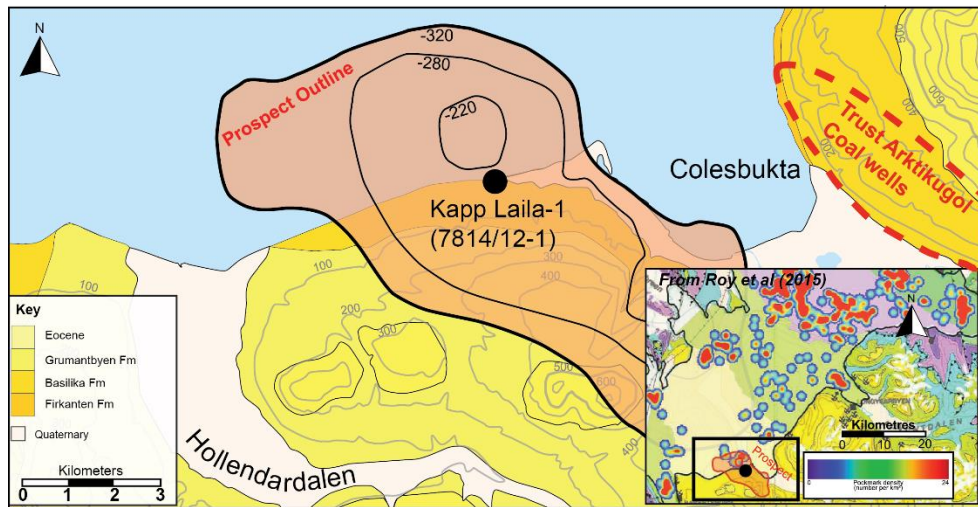

**Figure 10 - Map of the Kapp Laila area (based on Norsk Polarinstitutt, 2015 and SNSK, 1994) with the SNSK prospect and well location shown. Inset is a map of pockmarks on the seafloor of Isfjorden from Roy et al (2015). A high concentration of pockmarks on the seabed apparently overlies the crest of the prospect. The map location is shown in Fig. 1.**

Given the coastal location, permafrost is considered to be relatively thin, if present, and is almost certainly absent further offshore (Majewski and Zajaczkowski, 2007). Data from the Trust Arktikugol Colesbukta hydrocarbon exploration well (7815/10-1) is very limited though gas was reported to flow from deeper Triassic intervals (Senger et al., 2019). The SNSK Kapp Laila hydrocarbon exploration well (7814/12-1) does document some fifty metres of permafrost; although it is unclear on what information this is based on (Snsk, 1994). The well and prospect locations are shown in Fig. 10, interesting the crest of the prospect coincides with a cluster of pockmarks offshore (Roy et al., 2015). Gas shows in the form of dull yellow fluorescence were also documented at 44-52 m (Fig. 11), which coincides with the stated permafrost depth. It is important to note that fluorescence shows are not unequivocal proof of hydrocarbons and that yellow fluorescence can also be caused by dolomite and aragonite, although there is no evidence of these minerals in this interval. We have also identified methane seeps through a pingo system approximately 8 km to the east at Trodalen which are the subject of ongoing research in the area.

Trust Arktikugol coal boreholes from the early twentieth century apparently typically encountered permafrost at 100 m depth (Lytkevich, 1937). Though no specific wells are mentioned, the approximate location of these boreholes is highlighted in Fig. 10. These wells also encountered artesian water at depths of 229-339 m which flowed at 110 litres per minute (Lytkevich, 1937).

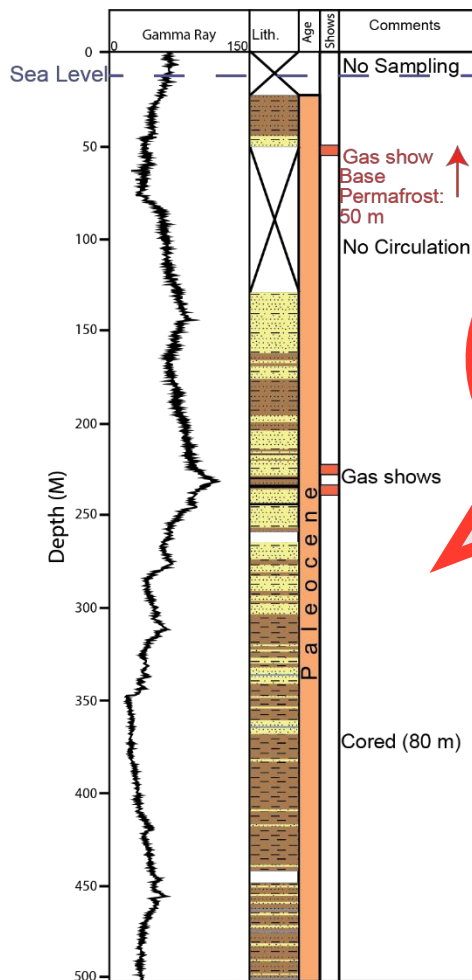

It is a real shame that there is not substantiation of pf for this well... relying on the SNSK reference seems v. weak to me. If they a strong science basis for pf determinations surely they should be shown?

**Figure 11 - The Kapp Laila well with all available data and geological and drilling comments. Minor gas shows occur at 50 m depth which coincides with the stated base of permafrost (SNSK, 1994).**

#### 4.3.2 Reindalen

The Reindalspasset well (7816/12-1) was drilled in 1991 by SNSK and Norsk Hydro and was the first well to target a prospect identified by seismic data (Senger et al., 2019). It also has a good set of petrophysical data over the permafrost-bearing interval. The Reindalen well is situated on the eastern fringes of the Central Tertiary Basin (Fig. 12A) but its primary target was a deeper rotated fault block of the Carboniferous Billefjorden fault zone. Well data suggests a geothermal gradient of 31°C/km (Betlem et al., 2018). Another observation of this area is the prevalence of pingos in the valley to the east and west which are indicative of migration pathways through the permafrost, some of which also exhibit methane seepage.

The well data shown in Fig. 12B demonstrates the challenges in identifying permafrost from petrophysical data, particularly in Svalbard where rocks are typically overcompacted. The rapid resistivity cycling in upper parts is likely due to thawing of permafrost and intermittent invasion of highly conductive, saline drilling fluids, though this is purely speculative. There are no major indicators in the acoustic data. Indeed, in both acoustic and resistivity data, probably due to low porosity in the permafrost bearing zone. The first good quality sandstone

intervals at around 170 m do possess low resistivities which are probably indicative of liquid water. Although the 2D seismic line is of good quality the permafrost details are not yet fully discussed.

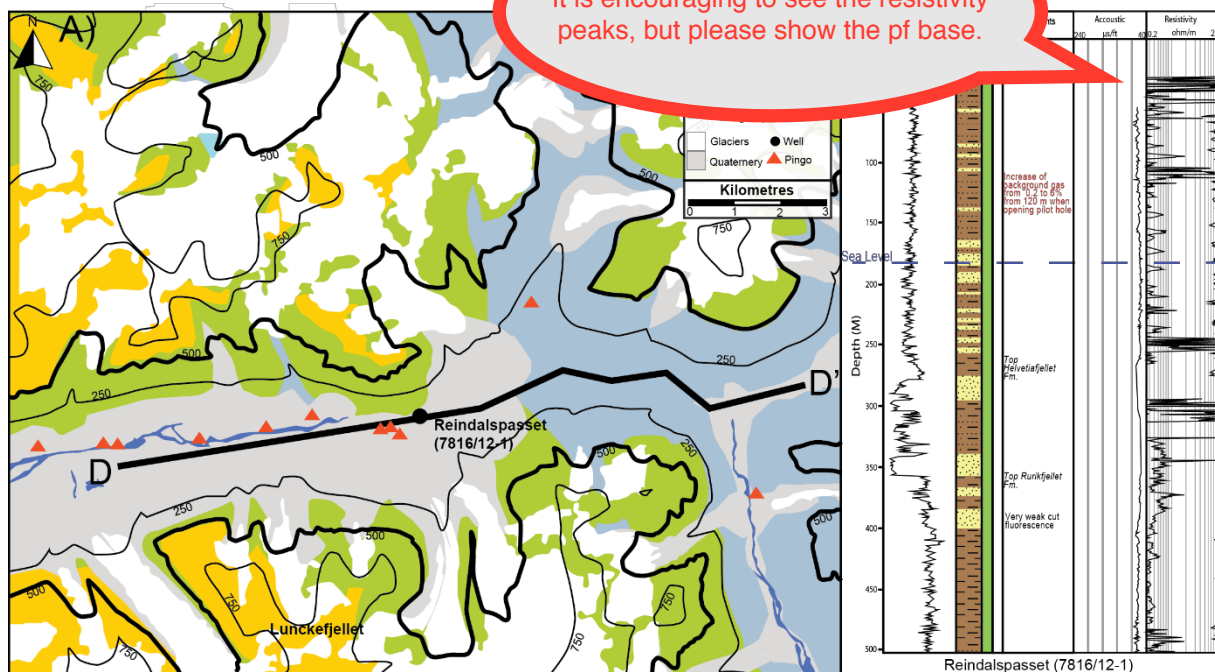

**Figure 12 – A) A Geological map of Reindalen (based on Norsk Polarinstitutt, 2015) with the Reindalspasset borehole shown. Lunckefjellet plateau is also shown, where several coal boreholes that experienced fluid losses. The map location is shown in Fig. 1. B) The petrophysical log over shallow intervals in Reindalspasset (7816/12-1). The well sits in the valley of Reindalen where a series of pingos are situated updip from the wellbore, on the north side of the valley. Line D to D' shows the location of the seismic line shown in Fig. 17.**

No accumulations or gas influxes occurred in upper parts of this well though a background gas increase was observed. A 12 ¼" (31.115 cm) pilot hole was drilled to 164 m and background gas was recorded steadily at 0.2%. This hole was subsequently opened up to the planned 16" (40.64 cm); at 120 m depth background gas suddenly rose to 6% (Norsk Hydro, 1991). Because widening the hole resulted in greater fluid circulation, drillers and the wellsite geologist attributed the rise in gas due to thawing of the permafrost. They further speculated that it may be due to hydrate dissociation, though as no samples or pressures were measured this hypothesis remains impossible to assess. It is also important to note that this occurred in a low permeability siltstone interval where any gas accumulations are unlikely to flow at a good rate.

At Lunckefjellet, approximately 5 km southwest of the 7816/12-1 hydrocarbon well, permafrost has been demonstrated to be approximately 550 m thick (Juliussen et al., 2010). Drilling fluid losses were encountered in several boreholes on the plateau (Snsk, 2011b, c, d), well within the permafrost interval.

### 4.3.3 Edgeøya

The Plurdalen (7721/6-1) and Raddedalen (7722/3-1) wells are some 29 km apart (Fig. 13A) and were both drilled in 1972 by different operators. They both penetrate thick Permian carbonates and Carboniferous rift successions. The uppermost 130 m of the Plurdalen well also encounters the lowermost parts of the Triassic Botneheia shales.

The permafrost base here occurs in very hard, low porosity and low permeability rocks. Because of this petrophysical data are, again, somewhat ambiguous here. Indeed, at Raddedalen the hard rocks in combination with permafrost meant the well initially failed to make any progress during spudding (Total Marine Norsk, 1972). Drilling the upper hundred metres was very slow and wellbore cavings were also common, possibly due to permafrost thawing. The drilling report for Raddedalen suggested the permafrost base was at 95 m (Total Marine Norsk, 1972). They based this on resistivity peaks above 5000  $\Omega\text{m}$  at depths shallower than 95 m, but not deeper, though we also note that this resistivity drop also coincided with a lithological change to shale. The report also describes cycling and skipping in the acoustic log over this depth due to intermittent tool contact with the wellbore wall caused by thawing at the permafrost base. The Raddedalen well data in Fig. 13B shows this but also demonstrates that this skipping begins nearer 60 m depth. A water influx occurred at 224 m and probably originated from the carbonate Wordiekammen Formation. The water influx was measured at 830 litres a minute and had a temperature of 5°C, so clearly is from well below permafrost. Assuming the well-derived geothermal gradient of 30°C/km (Betlem et al., 2018) this would put the base permafrost at 57 m depth, which matches well with the observed skipping in the acoustic log. The aquifer is also overpressured by 4.41 bar and probably of artesian origin.

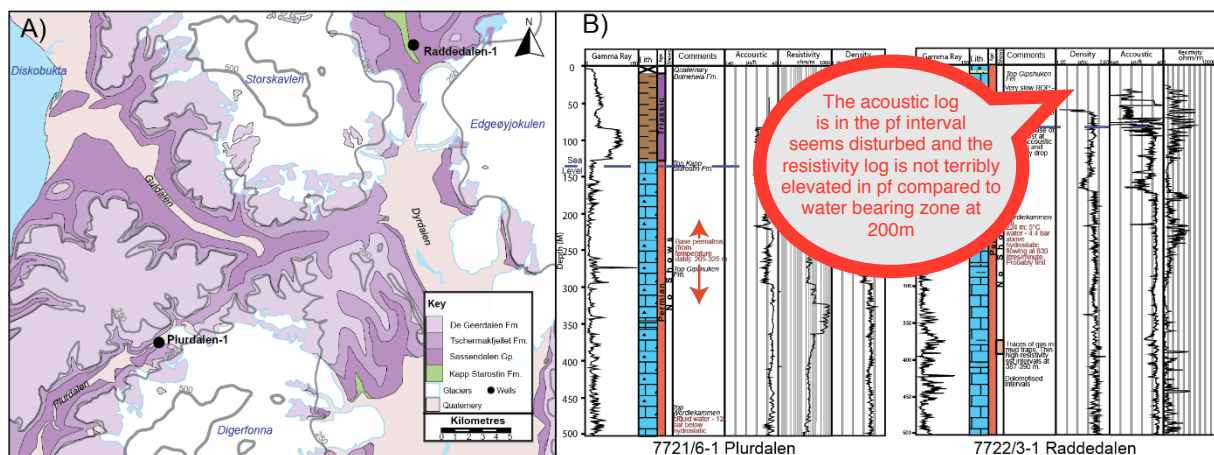

**Figure 13 - A) Geological map of central western Edgeøya based on Norsk Polarinstitutt (2015) showing the two hydrocarbon exploration wells on the island. The map location is shown in Fig. 1. B) Petrophysical logs from the hydrocarbon exploration wells at Plurdalen (7721/6-1) and Raddedalen (7722/3-1).**

At Plurdalen, a more complete set of petrophysical logs shows no clear evidence of permafrost or base permafrost. Temperature data apparently (Norske Fina a/S, 1972b, a) suggests base permafrost anywhere from 205 to 325 m. The log data does not appear to show any similar characteristics used to determine the base permafrost of the Raddedalen well. Liquid water, probably in the same Wordiekammen interval as at the

Raddedalen well, was encountered at approximately 500 m. The temperature or salinity of this water was not recorded but, surprisingly, the pressure was 12 bar below hydrostatic. The most likely explanation for the underpressure is due to outflow and equilibrium with the fjord to the west, as 12 bar of underpressure at the wellhead corresponds to a hydraulic head approximately at sea level.

Neither wells encountered hydrocarbons, neither did the Plurdalen well report any shows. Raddedalen had minor gas shows between 387-390 m and a trace increase in background gas in the mud returns (Norske Fina a/S, 1972a; Total Marine Norsk, 1972).

#### 4.3.4 Petuniabukta

At Petuniabukta, Verba (2013) describes gas accumulations in Carboniferous reservoirs that do not have an overlying lithological seal due to denudation and inclined and outcropping bedding. The author suggests a permafrost interval of 250 to 400 m where no liquid water was encountered and suggests this must be sealing. Oil has also been encountered in the area in small quantities (Senger et al., 2019). This indicates the accumulations are likely thermogenic and that there are source rocks capable of generating and expelling hydrocarbons, at least locally.

#### 4.4 Gas Samples – Adventdalen, Tromsøbreen and Hopen

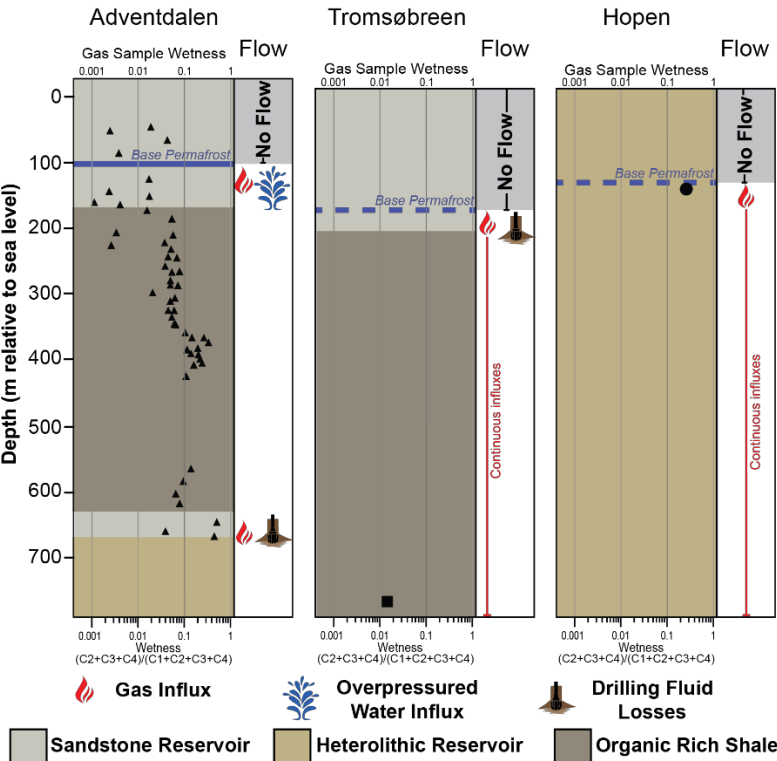

Figure 14 – Gas wetness from samples taken in wells from Adventdalen (Ohm et al, 2019), Tromsøbreen (Norsk Polar Navigasjon A/S, 1977b) and Hopen (Norske Fina A/S, 1972). The Hopen gas is much heavier and thus more prone to form hydrates at lower pressures and higher temperatures than methane.

Gas samples were taken by hydrocarbon exploration wells at Tromsøbreen and Hopen, with three samples taken at each. Their compositions are shown in Table 4. A comprehensive analysis of the gas at the Longyearbyen CO<sub>2</sub> was carried out by Ohm et al. (2019) and Huq et al. (2017), and a rudimentary analysis of the coal borehole gas discovery was carried out by Snsk (1981). These analyses of the gas accumulation and analysis of seeps of the pingo systems in the area (Hodson et al., 2019) show the base-permafrost accumulation is methane dominated. The more extensive analysis of the Longyearbyen CO<sub>2</sub> Lab gas provides a more complex story throughout the entire stratigraphy with contributions from biogenic and thermogenic sources (Ohm et al., 2019). The sub-permafrost gas at Hopen is much wetter and clearly from a thermogenic origin. Analysis at Tromsøbreen was taken from gas much deeper than that encountered at base permafrost. However, it shows this gas is relatively dry although still likely to be thermogenic due to the sample depth of 768 m and its extraction directly from the Agardhfjellet Formation source rock (Norsk Polar Navigasjon a/S, 1977b, a). Figure 14 shows the wetness of gas from the three locations, wetter gas means it has a greater component of heavier hydrocarbon molecules such as ethane or propane.

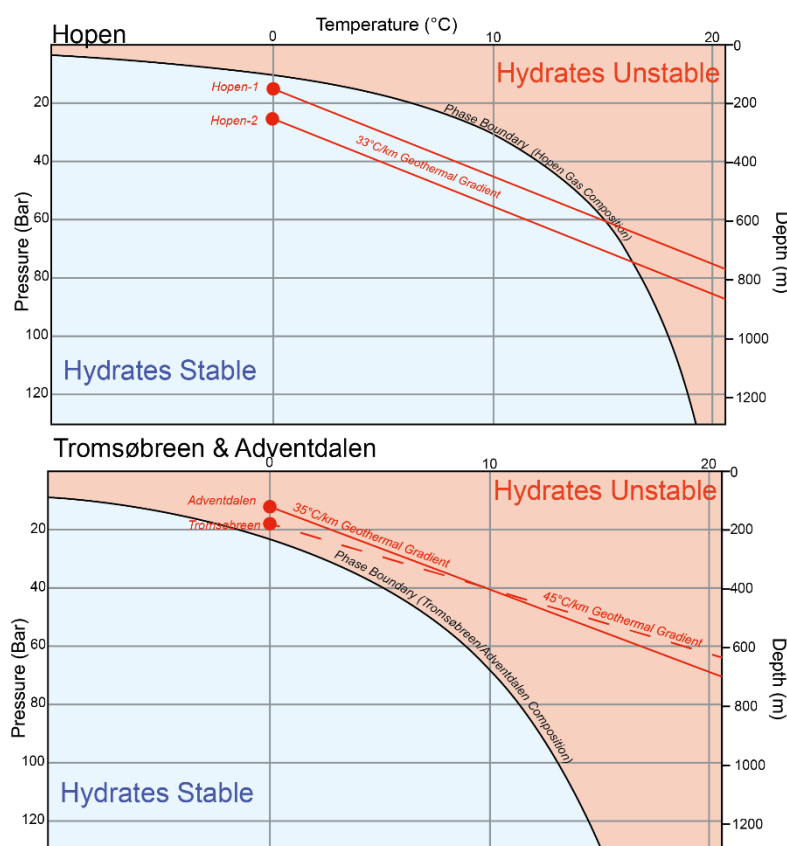

**Figure 15 – The upper graph shows the natural gas hydrate stability diagrams for the Hopen gas composition (Table 4). The lower graph shows the same for the Adventdalen (well DH4) and Tromsøbreen methane dominated gas compositions (Table 4 and Fig. 14). Red circles represent the base permafrost (0° C) depths using pressures based on a hydrostatic gradient from the surface. Lines represent stability with increasing depths at each locality based on local geothermal gradients (Betlem et al., 2018; Isaksen et al., 2000).**

The composition of the gas is important in understanding its potential phase in the subsurface. Figure 15 shows phase diagrams for the gas compositions and thermobaric conditions at Hopen, and at Adventdalen and

Tromsøbreen. While the dry gas at Tromsøbreen and Adventdalen is unlikely to be in hydrate form at their points of discovery, the gas at Hopen is much wetter. As a consequence, it is more susceptible to be thermodynamically stable as gas hydrate form (Betlem et al., 2019). In light of this, we modelled the potential gas hydrate stability zone over Hopen based on the sampled composition. Figure 9C shows a thick zone where natural gas hydrates of this composition are likely stable.

| Sample Number       | Sample run 1                     | Sample run 2 | Sample run 3 | Sample run 1              | Sample run 2 | Sample run 3 |
|---------------------|----------------------------------|--------------|--------------|---------------------------|--------------|--------------|
| <b>Hydrocarbons</b> | <b>7617/7-1 (Tromsøbreen I)</b>  |              |              | <b>7625/7-1 (Hopen I)</b> |              |              |
| <b>C1</b>           | 64.79 - 70.81                    | 68.57        | 63.84        | 92.35                     | 94.97        | 97.24        |
| <b>C2</b>           | 20.23 - 18.67                    | 18.20        | 20.21        | 0.11                      | 0.05         | 0.49         |
| <b>C3</b>           | 10.97 - 7.76                     | 9.26         | 11.10        | 0.09                      | 0.01         | 0.16         |
| <b>C4</b>           | 3.51 - 2.46                      | 3.39         | 4.08         | 0.18                      | 0.06         | 0.20         |
| <b>C5+</b>          | 0.58 - 1.32                      | 1.22         | 0.79         | 0.97                      | 1.03         | 0.96         |
| <b>Nitrogen</b>     | Abnormally High (not quantified) |              |              | 6.26                      | 3.86         | 0.91         |
| <b>CO2</b>          | -                                |              |              | 0.04                      | 0.02         | 0.04         |
| <b>Gravity</b>      | -                                |              |              | 0.609                     | 0.600        | 0.591        |

**Table 4 – Geochemical data from samples taken at the hydrocarbon exploration wells at Tromsøbreen-1 and Hopen-1.**

## 5 Discussion

### 5.1 Identifying base permafrost

The active layer and upper parts of the permafrost interval are well-studied in Svalbard (Westermann et al., 2010; Rachlewicz and Szczuciński, 2008; Strand et al., in press). However, the base permafrost is rarely the focus of study with data coming overwhelmingly from industrial boreholes. Petrophysical data from predominantly hydrocarbon wells may show some fluid trends that can be attributed to the transition from ice-bearing to water-bearing strata. However, the complex geology largely overprints fluid responses. This is most likely due to the generally low porosity of the rocks due to overcompaction due to deep burial and subsequent uplift. Additionally, it may be reflective of the diffuse nature of the base permafrost. The most robust cases demonstrating the base permafrost actually occur where there is very little change in the petrophysical data. Because geology, rather than fluid content dominates the petrophysical response, the clearest cases are where there are sudden fluid influxes into the wellbore with no change in the geological properties of the reservoir rock itself. These influxes with no apparent lithological top seal occur in numerous locations throughout Svalbard, most notably in multiple wells in Adventdalen, Hopen, Tromsøbreen, Gipsdalen, and Petuniabukta. These occurrences show no particular prevalence with respect to age or depositional setting of the reservoir.

Permafrost is typically not considered to be present in coastal areas of Svalbard. However, evidence from Tromsøbreen, and possibly also at Hopen, Petuniabukta and Kapp Laila, suggest that ice-bearing permafrost is present in these areas (Fig. 3) and may even continue offshore.

The areas where permafrost has been modelled shows broad agreement with well-based observations in the areas. Discrepancies are due to both the fact the modelled permafrost is based on temperatures, as per definition,

while well-based observations identify the base of ice-bearing permafrost which is also dependent on water content, flow and its salinity. In addition, subsurface complexities are not captured in the model, for example the forty-metre discrepancy between modelled and observed permafrost at Tromsøbreen is probably additionally influenced by an overestimation of the geothermal gradient, the complex local geology and is in a heavily glaciated area.

## 5.2 Permafrost formation and sealing effectiveness

Theoretically, the permafrost interval should form an extremely effective seal or “cryogenic cap”. If ice-bound it is impermeable, often thick and has the ability to self-seal through freezing water in the event of fracturing. In reality the story is a little more complex and the seal-forming process is extremely poorly understood. An effective permafrost seal is demonstrable in various locations in Svalbard by the presence of gas and abnormally pressured water at the base of permafrost. This appears to be the case where the permafrost zone is ice-saturated, most notably in valley settings. The previously described drilling losses in wells on the plateaus of Platåberget, Breinosa Operafjellet, Lunckefjellet in addition to Ispallen (Snsk, 2014, 2013a, b, c) occurred in known permafrost intervals (Juliussen et al., 2010). This suggests that in these highland areas, at least, that permafrost is not forming a continuous impermeable seal.

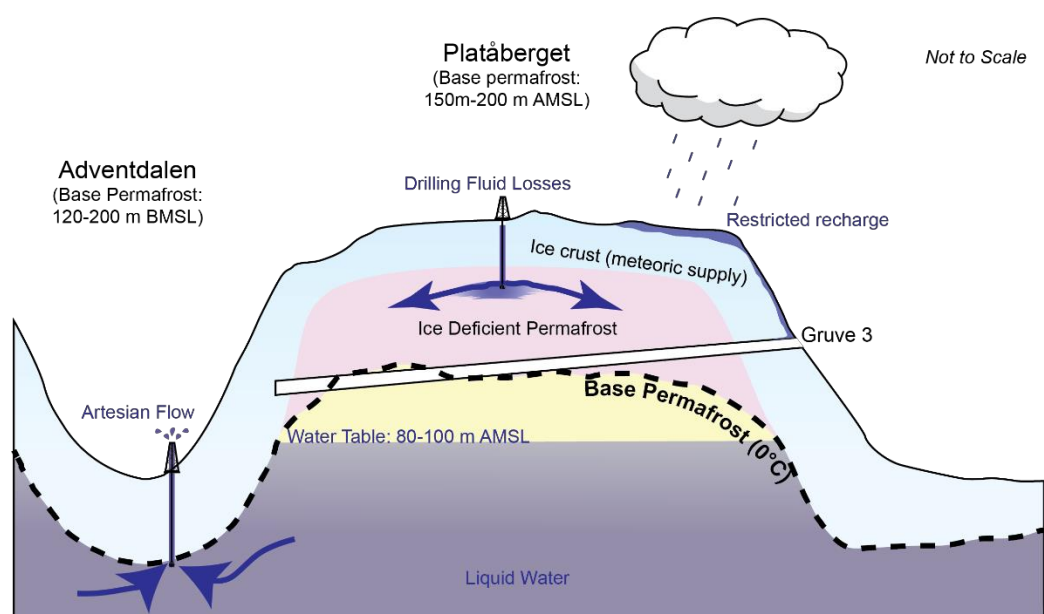

**Figure 16 – Schematic cross section of the permafrost interval at Platåberget. Artesian pressures in the valley wellbore 1967-1 suggest an elevated water table (Table 5) which still sits below the base of permafrost in the mountain. The lack of water supply from below during permafrost formation leads to a dry and permeable permafrost interval and subsequent drilling losses. Similar drilling fluid losses appear common in the permafrost interval in several plateau areas in Svalbard. In the valleys the permafrost interval forms through the water table and results in a thick impermeable ice seal.**

The valley-based permafrost interval has been shown to contain a proportion of liquid water (Keating et al., 2018) in the form of microfilms and hypersaline pockets. Despite this, the interval remains impermeable to both water and gas. Gas accumulations beneath the permafrost appear to be common and widespread regardless of

stratigraphy (Figs. 2, 3 and Table 3) which demonstrates the good sealing potential. Abnormal pressures are common at the base of permafrost in several locations in Svalbard which demonstrates the sealing properties of the overlying permafrost. The best data is in Adventdalen where sudden, slightly saline, water influxes occur at the base of permafrost in the Helvetiafjellet Formation. The strong and sustained flow rates indicate appreciable lateral connectivity within the aquifer, indicating an artesian origin of overpressure. The current view of this overpressure is attributed to the formation of permafrost (Hornum et al., 2020) but the high flow rates (Magnabosco et al., 2014), reservoir connectivity and its outcropping beneath the fjord to the west (Blinova et al., 2012) discount this.

| Case                                           | High       | Low         |
|------------------------------------------------|------------|-------------|
| <b>Contact</b>                                 | 160 m      | 210 m       |
| <b>Buoyancy Pressure (gas SG = 0.5537)</b>     | 7.1 bar    | 9.3 bar     |
| <b>Aquifer Overpressure</b>                    | 6.9 bar    | 4.7 bar     |
| <b>Hydraulic Head Elevation (well: 32.5 m)</b> | 103 m AMSL | 79.2 m AMSL |

**Table 5 – Aquifer pressure calculation from wellhead pressures in well 1967-1 and the possible gas-water contact wellbore 1971-10. The low case uses a saline water pressure gradient of 0.10067 bar/m while high case uses freshwater gradient of 0.09795 bar/m.**

In highland areas the role of permafrost as a seal is less clear. Gas blowouts, like the documented occurrence in well 1990-12 on Slaknosa plateau, were quite common based on anecdotal evidence. In the case of Slaknosa it is likely that the permafrost acts as a seal. This is because the formations outcrop in the cliff sides so must require a seal strong enough to withhold significant buoyancy pressure both above and laterally in the reservoir. However, in other highland areas, including on Platåberget and Breinosa on the southern side of Adventdalen, the permafrost interval appears to not be fully ice saturated.

The difference between the permafrost sealing potential in highlands and valleys can be explained by the availability of water and the permafrost formation mechanism. Permafrost forms from the top-down, and as it forms near the surface, it restricts the amount of meteoric input from the surface. As the permafrost thickens, a water deficiency will develop if the water table remains deeper than the base of permafrost. Present day pressures in Adventdalen (Table 5) suggest a hydraulic head well below the base permafrost which may explain the water deficiency within the permafrost interval. This may lead to a thinner permafrost seal with potential migration pathways through it, which may explain perennial springs at elevations up to 350 m around Breinosa. In valley settings, the permafrost develops below the water table so there is always plentiful access to water, resulting in a thick ice-saturated interval. This difference in water-availability during permafrost formation may be critical to the development of an effective permafrost seal and explains why highland wells, such as those on Platåberget, suffer drilling losses whilst those in the valley do not (Fig. 16). At Slaknosa, which is a highland setting, the permafrost likely developed while having a constant water flux from the (presently) warm-based glacier, Slakbreen, which is juxtapose and above the Slaknosa plateau. Regardless, the role of permafrost as a seal in highland areas is clearly more complex than in the valleys. Another mechanism that could prevent water from entering and freezing in the permafrost interval could be the early emplacement and trapping of gas.

Natural pathways through the cryospheric cap, even in areas of thick permafrost, are present in the form of pingos, springs, warm-based glaciers, and beneath the fjords. Ice maybe more prone to fracturing, particularly in shallow intervals where it is under little compression (Schulson, 2001). This may lead to fracture pathways through the cryospheric cap although they likely self-heal through freezing water. At the Reindalen petroleum exploration borehole pingos are situated up-dip and probably represent a natural leak point for gas (Fig. 17). Elevated gas readings at 120 m in the wellbore likely represent a migration pathway at the base of permafrost toward the pingos. Similarly, gas shows at Kapp Laila coincide with a potential migration pathway at the base of permafrost. The crestal point of this carrier bed is a short distance offshore (Fig. 10) which is also coincidental with the presence of pockmarks on the seafloor (Roy et al., 2015) where a potentially shallow permafrost tapers out.

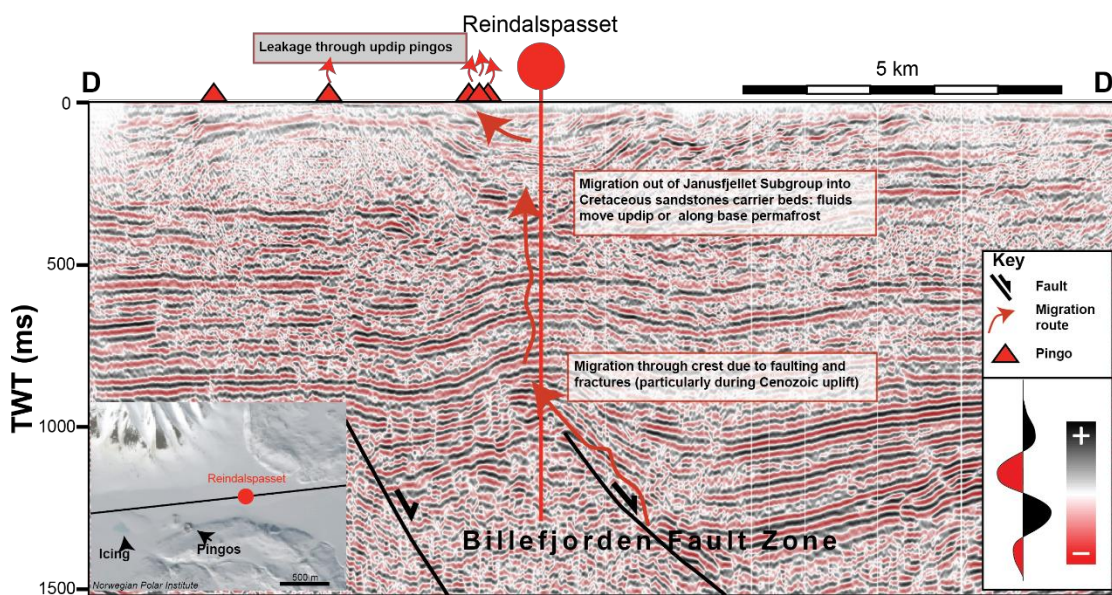

**Figure 17 – A seismic section intersecting the Reindalspasset wellbore, from Bælum and Braathen (2012). Deeper thermogenic gas likely migrates through the crests of the Billefjorden Fault Zone. Further shallow migration occurs through permeable Cretaceous stratigraphy and bypasses the permafrost seal through the pingo system to the west. The location of the seismic section is shown in Fig. 12.**

### 5.3 Permafrost Traps

In order for gas to accumulate beneath the permafrost a trap must be present. The undulating base of permafrost can form a trap and seal itself, or it may act as the top seal in combination with the underlying geology, these examples are shown in Fig. 18. In the former, traps may form beneath mountains if the interval is water saturated. This is because, although thicker, the base of permafrost is shallower than the surrounding valleys and leads to natural concave-down structures for buoyant gas accumulations. In valley settings where the base permafrost forms a synclinal structure it is more likely that accumulations are situated within combination traps. This is further supported by the fact the regional and local geology in Svalbard is rarely flat and contains multiple lithological seals and reservoirs. In these traps a combination of structural geology, lithology and permafrost properties contribute to developing hydrocarbon accumulations. This mechanism can be attributed to

This figure suggests that the permafrost is a different geologic unit.. surely the bedrock continues to the surface.. suggest showing blue for your pf interval as a transparent fill. The legend terms seems exaggerated... reservoirs are buried at depth and with the arrows apparently indicating leakage and migration.. is the yellow simply not just permeable water saturated bedrock?, gas accumulation.. what does this mean.. I am guessing simply gas prone

The combination of this combination trap type and the ice-conditions have been frequently encountered in valleys rather than over permafrost in highlands. Smaller accumulations, such as the one localised undulations in the base-permafrost.

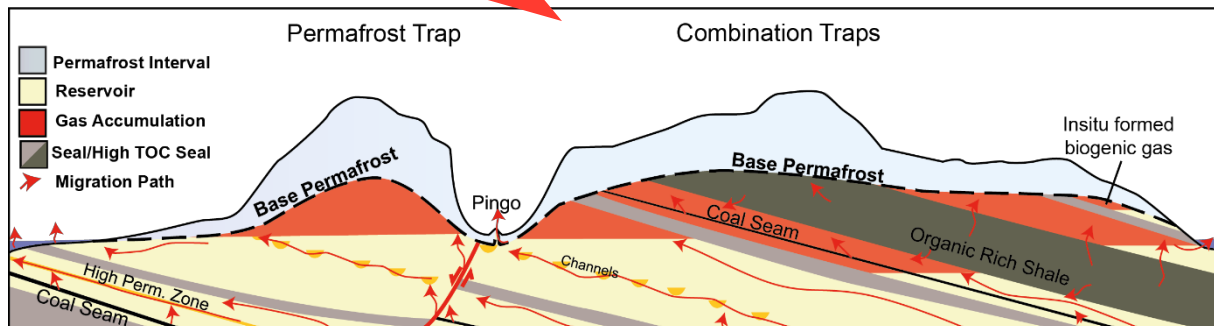

**Figure 18 – The different trapping mechanisms permafrost can provide. Undulations in the base permafrost alone may form traps, which may be large under mountains if the permafrost seal is effective. Combination traps require permafrost to contribute a lesser sealing surface area and appears to be the mechanism for trapping gas in Adventdalen (Fig. 19).**

Gas trapped in hydrate form under the right thermobaric conditions is the exception to the previously discussed trapping mechanisms. The gas sampled at Hopen is a strong candidate to originate from hydrates. The heavier gas composition (Table 4) means it has a greater propensity to form hydrates at a given depth and temperature (Fig. 9C). If the permafrost zone is drier in mountainous areas then it will mean the hydrostatic pressures beneath them are lower than presently assumed. Therefore, they may be slightly less favourable for the formation of natural gas hydrates due to lower-than-expected pressures.

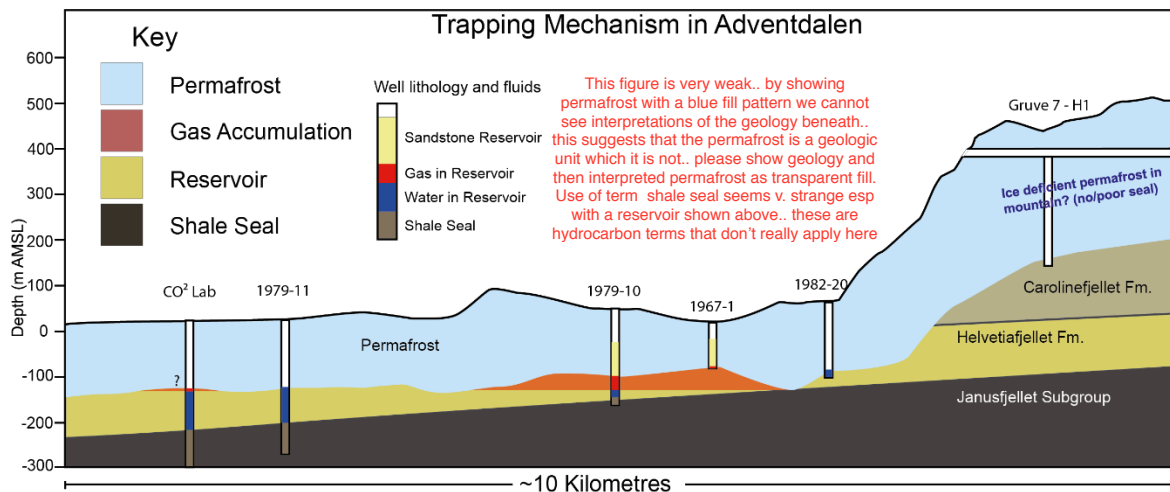

**Figure 19 – The potential combination-trapping style of the Adventdalen gas accumulation based on well observations.**

## 5.4 Origins of gas

Gas originating from permafrost is typically attributed to a biogenic origin, primarily because thermogenic gas is generated and migrates on much longer timescales. While biogenic gas is undoubtedly a contributor to sub-permafrost gas in Svalbard (Hodson et al., 2019), thermogenic gas is also clearly a major contributor in several locations (Ohm et al., 2019). In light of this, the lack of any accumulations or significant shows in the wells on Edgeøya is probably due to the lack of any underlying prolific source rock.

Approximately 60% of wells in the Barents Shelf offer hydrocarbon shows (Senger et al., 2020), indicating that the basin has at one point in the past been almost saturated with hydrocarbons. The large ultra-shallow discoveries like Wisting, containing relatively unbiodegraded oil, are evidence of more geologically recent hydrocarbon migration. This recent migration is almost certainly driven by major recent uplift over the past thousands to hundreds-of-thousands of years (Henriksen et al., 2011).

Svalbard itself has undergone the greatest uplift of anywhere in the region, hence its existence as an archipelago. The numerous prolific source rocks mean Svalbard is unique from other Arctic areas. Recent uplift has enabled gas to escape directly from the source rocks or from deeper accumulations. The formation of permafrost has effectively added a last line of defence preventing this gas from escaping to the atmosphere.

## 5.5 Timing and migration

Figure 20 is a petroleum systems chart with a focus on sub-permafrost accumulations in Svalbard. Clearly, all other elements of the petroleum system must be present prior to migration taking place. Here the timescales are binary with source, reservoirs and lithological seals forming tens or hundreds of millions of years ago and permafrost forming during the past few or tens of thousands of years. Therefore, the most critical elements in this system are the permafrost seal and gas migration.

The thermogenic gas must have been originated generated long before the formation of permafrost in the area because the source rocks of the area are no longer deep enough to generate hydrocarbons. Recent migration is almost certainly occurred during recent and ongoing uplift (Henriksen et al., 2011) due to repeated cycles of glacial loading and unloading (Ohm et al., 2008). This has been ongoing throughout the Pleistocene and predates permafrost formation. Therefore, the critical moment for most sub-permafrost gas accumulations in Svalbard is the timing of permafrost formation itself. The exception to this is in the extremely young moraine sediments in the case of Kapp Amsterdam, which also highlights ongoing gas migration.

Gas migration will occur through permeable intervals, typically at the crest of structures. Faults may aid the movement of gas from deeper structures, particularly during uplift and fault reactivation as appears to be the case at Reindalen (Fig. 17) which sits on the Billefjorden Fault Zone (Bælum and Braathen, 2012). The discovery of shale gas in Adventdalen (Ohm et al., 2019) also shows that source rocks still internally trap large amounts of gas. This gas will have migrated directly out of source rocks during uplift due to gas expansion and rock fracturing.

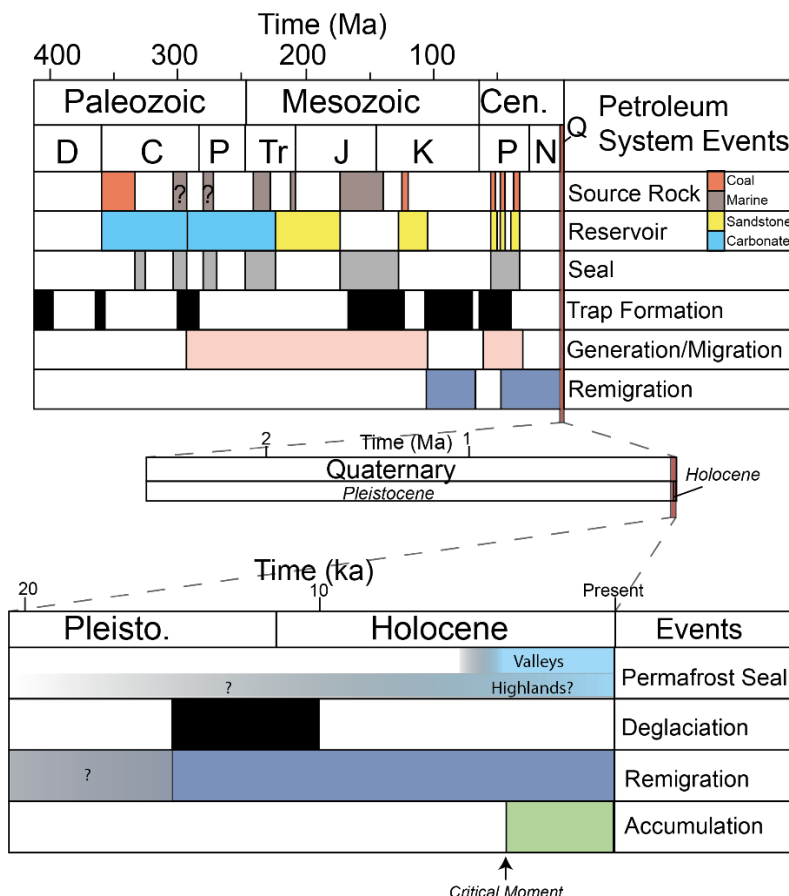

**Figure 20 - Petroleum systems chart for Svalbard. The upper part covers the important elements of the past 400 million years whereas the lower parts show the importance of the most recent events. The critical moment is the timing of permafrost formation, which is also evidence that gas migration must also have been occurring recently, and most likely ongoing today.**

Common.. hmm your stats that follow suggest to me

## 5.6 Size, frequency and consequences of gas

Gas accumulations beneath permafrost appear to be a common occurrence in Svalbard and they show no preference to stratigraphic age or geological setting. It is important to remember that none of the wells that encountered sub-permafrost gas were actually looking for it, indeed most hydrocarbon exploration wells aim to avoid such shallow gas accumulations (Ronen et al., 2012). In this study, of eighteen hydrocarbon wells in Svalbard, eight show good evidence of permafrost (44%). Four of these permafrost bearing wells show moveable gas accumulations at the base of permafrost (22% of all wells or 50% of permafrost bearing wells), three clearly show no presence of an accumulation while one contains gas shows. Expanding this to all wells in this study, 18 show evidence of permafrost and 9 of these showing evidence of gas accumulations (50%), though the coal wells for this study were obviously selected in areas of interest. This is an extremely high success rate for something that was not being looked for, and thus highlights the likelihood that these gas accumulations are a very common occurrence. For reference, the Barents Shelf has one of the highest technical success rates in the world at just below 50% (Norwegian Petroleum Directorate, 2020) for prospects that have been specifically targeted using advanced geological and geophysical methods.

As with conventional hydrocarbon accumulations, the size of sub-permafrost accumulations probably varies significantly. The accumulation in Adventdalen is relatively significant, but also of little economic interest; the 1967-1 well produced in excess of 2.5 million cubic metres of gas between 1967 and 1975 (Snsk, 1981). Despite being of little economic interest, these accumulations may still provide an alternative and cleaner energy source than coal, which is presently used to generate power in Svalbard. Unfortunately the data are quite poor because the well was also periodically shut in over this time. Speculatively, if the convex-up shaped base permafrost below mountains acts as an effective trap then volumes may be even larger than the (relatively) better understood accumulations, in the valleys. Given the encountered overpressures in both water and gas bearing rocks it is fair to assume that the permafrost seal can withstand significant buoyancy pressures or large gas columns. It is more likely that the accumulations are regulated laterally by natural pathways through the permafrost at pingos, fjords or glaciers.

|                                                        |                             |
|--------------------------------------------------------|-----------------------------|
| <b>Area of Hopen</b>                                   | <b>46.12 km<sup>2</sup></b> |
| <b>Approximate thickness of hydrate stability zone</b> | 600 m (This study)          |
| <b>Net to Gross (sandstone)</b>                        | 25% (Hynne, 2010)           |
| <b>Average Porosity</b>                                | 14% (Mørk, 2013)            |
| <b>Volume as free gas</b>                              | 968 Million Sm <sup>3</sup> |
| <b>If Hydrate</b>                                      | 154.963 Billion Cu. m.      |

Any discussion of hydrate thicknesses seems v. speculative to me and including hydrate volume absolutely speculative.

**Table 6 – Estimation of gas volume under Hopen using properties from the stated publications. This assumes the stability zone is saturated to its base, which is highly dependent on the migration rate of gas. This may be somewhat unreasonable to assume but it is worth noting that the wells did monitor persistent gas influxes throughout the entire interval.**

Because the sub-permafrost accumulations are relatively shallow and under lower pressure, the gas will be much less dense, and thus voluminous, than conventional deeper accumulations. The exception to this is if the gas is in hydrate form where methane concentrations are some 160 times higher than in free gas form (Majorowicz and Hannigan, 2000). Table 6 shows the potential volumes of gas within the hydrate stability zone beneath Hopen using typical net to gross and reservoir properties for the De Geerdalen Formation (Mørk, 2013; Hynne, 2010). The calculations show volumes for both free gas, under atmospheric pressure and if it is in hydrate form.

Given the sparse data and bias in drilling locations it is impossible to be very quantitative with respect to the size and frequency of these accumulations. What is evident is that permafrost is acting as an ultimate seal to these accumulations, and that they are numerous, and, based on the only occurrence where flow was recorded, on the orders of million cubic metres.

## 5.7 Regional distribution

Based on the occurrences in Svalbard, the prerequisites for sub-permafrost gas to accumulate are, firstly, an impermeable (ice-saturated) permafrost layer, secondly, a source of gas and, finally, gas migration at a time after permafrost formation. Much of the Circum-Arctic shares a similar geological history with Svalbard. A major source of migrating gas in Svalbard is likely from the Mesozoic source rocks (Ohm et al., 2019), which can also

be found in the Russian and North American Arctic (Leith et al., 1993; Polyakova, 2015). Recent uplift caused by isostatic rebound has left fluids in the subsurface on the Barents and Svalbard out of pressure equilibrium and driving present-day migration (Birchall et al., 2020). Svalbard shares its Pleistocene glacial history with the Circum-Arctic (Batchelor et al., 2019) so it is not unreasonable to expect sub-permafrost gas accumulations to be regionally widespread. Indeed, gas emanating from zones of permafrost is well-documented onshore and offshore in the Russian Arctic, particularly in hydrocarbon provinces (Chuvilin et al., 2020 and references therein) and as natural gas hydrates (Yakushev & Chuvilin, 2000).

## 6 Conclusion

Although gas at the base of permafrost has been encountered frequently during more than fifty years of drilling in Svalbard, it has not been studied or widely recognised until now. In this study we have provided a synthesis of historical and modern observations and its implications. With the Arctic warming faster than anywhere else on the planet (Lind et al., 2018), it seems likely that thawing permafrost in Svalbard will contribute to a positive feedback loop in releasing major amounts of trapped methane into the atmosphere. Furthermore, hydrates, which are probably present locally, are particularly susceptible to small changes in thawing permafrost and warming temperatures (Betlem et al., 2019; Sloan Jr et al., 2007). In a local context, it may be feasible to exploit these resources to provide a local source of power, which is currently reliant on coal.

The presence of permafrost associated gas and gas hydrates are an extremely important subject with recent studies showing the presence of shallow gas throughout the Circum-Arctic (Nielsen et al., 2014; Minshull et al., 2020; Hodson et al., 2020; Chuvilin et al., 2020), much of which shares its geological history with Svalbard. Insights into sub-permafrost dynamics from the vast number of economic boreholes through the permafrost in Svalbard can be applied to analogous areas to understand and predict the ongoing processes.

## Acknowledgements

This research is funded by the Research Centre for Arctic Petroleum Exploration (ARCEX) partners and the Research Council of Norway (grant number 228107), CLIMAGAS (grant number 284764) and the Norwegian CCS Research Centre (grant number 257579). We sincerely appreciate access to Store Norske Spitsbergen Kulkompani's vast internal archives and to the data from the Longyearbyen CO<sub>2</sub> lab project (<http://co2-ccs.unis.no>). We also thank Sarah Strand for fruitful discussions on permafrost dynamics.

## 809      **References**

- 810      Aagaard, K., Foldvik, A., and Hillman, S.: The West Spitsbergen Current: disposition and water mass  
811      transformation, *Journal of Geophysical Research: Oceans*, 92, 3778-3784,  
812      <https://doi.org/10.1029/JC092iC04p03778>, 1987.
- 813      Abay, T., Karlsen, D., Lerch, B., Olaussen, S., Pedersen, J., and Backer-Owe, K.: Migrated petroleum in  
814      outcropping Mesozoic sedimentary rocks in Spitsbergen: Organic geochemical characterization and  
815      implications for regional exploration, *Journal of Petroleum Geology*, 40, 5-36,  
816      <https://doi.org/10.1111/jpg.12662>, 2017.
- 817      Anell, I. M., Braathen, A., and Olaussen, S.: The Triassic–Early Jurassic of the northern Barents Shelf: a  
818      regional understanding of the Longyearbyen CO<sub>2</sub> reservoir, *Norsk Geologisk Tidsskrift*, 94, 83-98,  
819      2014.
- 820      Anthony, K. M. W., Anthony, P., Grosse, G., and Chanton, J.: Geologic methane seeps along  
821      boundaries of Arctic permafrost thaw and melting glaciers, *Nature Geoscience*, 5, 419-426,  
822      <https://doi.org/10.1038/ngeo1480>, 2012.
- 823      Bælum, K. and Braathen, A.: Along-strike changes in fault array and rift basin geometry of the  
824      Carboniferous Billefjorden Trough, Svalbard, Norway, *Tectonophysics*, 546, 38-55,  
825      <https://doi.org/10.1016/j.tecto.2012.04.009>, 2012.
- 826      Batchelor, C. L., Margold, M., Krapp, M., Murton, D. K., Dalton, A. S., Gibbard, P. L., Stokes, C. R.,  
827      Murton, J. B., and Manica, A.: The configuration of Northern Hemisphere ice sheets through the  
828      Quaternary, *Nature Communications*, 10, 1-10, <https://doi.org/10.1038/s41467-019-11601-2>, 2019.
- 829      Beka, T. I., Senger, K., Autio, U. A., Smirnov, M., and Birkelund, Y.: Integrated electromagnetic data  
830      investigation of a Mesozoic CO<sub>2</sub> storage target reservoir-cap-rock succession, Svalbard, *Journal of*  
831      *Applied Geophysics*, 136, 417-430, <https://doi.org/10.1016/j.jappgeo.2016.11.021>, 2017.
- 832      Betlem, P., Senger, K., and Hodson, A.: 3D thermobaric modelling of the gas hydrate stability zone  
833      onshore central Spitsbergen, Arctic Norway, *Marine and Petroleum Geology*, 100, 246-262,  
834      <https://doi.org/10.1016/j.marpetgeo.2018.10.050>, 2019.
- 835      Betlem, P., Midttømme, K., Jochmann, M., Senger, K., and Olaussen, S.: Geothermal Gradients on  
836      Svalbard, Arctic Norway, First EAGE/IGA/DGMK Joint Workshop on Deep Geothermal Energy, cp-577-  
837      00017,
- 838      Bily, C. and Dick, J.: Naturally occurring gas hydrates in the Mackenzie Delta, NWT, *Bulletin of*  
839      *Canadian Petroleum Geology*, 22, 340-352, <https://doi.org/10.35767/gscpgbull.22.3.340>, 1974.
- 840      Birchall, T., Senger, K., Hornum, M., Olaussen, S., and Braathen, A.: Underpressure in the northern  
841      Barents shelf: Causes and implications for hydrocarbon exploration, *AAPG Bulletin*, 38,  
842      <https://doi.org/10.1306/02272019146>, 2020.
- 843      Birkenmajer, K., Nagy, J., and Dallmann, W. K.: Geological Map Svalbard 1:100,000. Markhambreen,  
844      Spitsbergen, Norsk Polarinstitut, Tromsø, 1992.
- 845      Blinova, M., Inge Faleide, J., Gabrielsen, R. H., and Mjelde, R.: Seafloor expression and shallow  
846      structure of a fold-and-thrust system, Isfjorden, west Spitsbergen, *Polar Research*, 31, 11209,  
847      <https://doi.org/10.3402/polar.v31i0.11209>, 2012.
- 848      Boucher, O., Friedlingstein, P., Collins, B., and Shine, K. P.: The indirect global warming potential and  
849      global temperature change potential due to methane oxidation, *Environmental Research Letters*, 4,  
850      044007, 2009.
- 851      Braathen, A., Bælum, K., Maher Jr, H., and Buckley, S. J.: Growth of extensional faults and folds during  
852      deposition of an evaporite-dominated half-graben basin; the Carboniferous Billefjorden Trough,  
853      Svalbard, *Norwegian Journal of Geology*, 91, 137, 2012.
- 854      Christiansen, H. H., French, H. M., and Humlum, O.: Permafrost in the Gruve-7 mine, Adventdalen,  
855      Svalbard, *Norsk Geografisk Tidsskrift-Norwegian Journal of Geography*, 59, 109-115,  
856      <https://doi.org/10.1080/00291950510020592>, 2005.
- 857      Christiansen, H. H., Etzel Müller, B., Isaksen, K., Juliussen, H., Farbro, H., Humlum, O., Johansson, M.,  
858      Ingeman-Nielsen, T., Kristensen, L., and Hjort, J.: The thermal state of permafrost in the Nordic area

859 during the International Polar Year 2007–2009, *Permafrost and Periglacial Processes*, 21, 156-181,  
860 <https://doi.org/10.1002/ppp.687>, 2010.

861 Chuvilin, E., Yakushev, V. S., and Perlova, E.: Gas and possible gas hydrates in the permafrost of  
862 Bovanenkovo Gas Field, Yamal Peninsula, west Siberia, *Polarforschung*, 68, 215-219, 2000.

863 Chuvilin, E., Ekimova, V., Davletshina, D., Sokolova, N., and Bukhanov, B.: Evidence of Gas Emissions  
864 from Permafrost in the Russian Arctic, *Geosciences*, 10, 383,  
865 <https://doi.org/10.3390/geosciences10100383>, 2020.

866 Collett, T. S., Lee, M. W., Avena, W. F., Miller, J. J., Lewis, K. A., Zyrianova, M. V., Boswell, R., and Inks,  
867 T. L.: Permafrost-associated natural gas hydrate occurrences on the Alaska North Slope, *Marine and*  
868 *Petroleum Geology*, 28, 279-294, <https://doi.org/10.1016/j.marpetgeo.2009.12.001>, 2011.

869 Dallmann, W. K., Elvevold, S., Gerland, S., Hormes, A., Majka, J., Ottemöller, L., Pavlova, O., and  
870 Sander, G.: *Geoscience atlas of Svalbard*, 2nd Edition, Norsk Polarinstitutt, Tromsø, Norway 2015.

871 Dimakis, P., Braathen, B. I., Faleide, J. I., Elverhøi, A., and Gudlaugsson, S. T.: Cenozoic erosion and the  
872 preglacial uplift of the Svalbard–Barents Sea region, *Tectonophysics*, 300, 311-327,  
873 [https://doi.org/10.1016/S0040-1951\(98\)00245-5](https://doi.org/10.1016/S0040-1951(98)00245-5), 1998.

874 Divine, D. V. and Dick, C.: Historical variability of sea ice edge position in the Nordic Seas, *Journal of*  
875 *Geophysical Research: Oceans*, 111, <https://doi.org/10.1029/2004JC002851>, 2006.

876 Dörr, N., Lisker, F., Jochmann, M., Rainer, T., Schlegel, A., Schubert, K., and Spiegel, C.: Subsidence,  
877 rapid inversion, and slow erosion of the Central Tertiary Basin of Svalbard: Evidence from the thermal  
878 evolution and basin modeling, in: *Circum-Arctic Structural Events: Tectonic Evolution of the Arctic*  
879 *Margins and Trans-Arctic Links with Adjacent Orogens*, edited by: Piepjohn, K., Strauss, J. V., Lutz, R.,  
880 and McClelland, W. C., The Geological Society of America, Boulder, Colorado, 169-188, 2018.

881 Dypvik, H. and Zakharov, V.: Fine-grained epicontinental Arctic sedimentation—mineralogy and  
882 geochemistry of shales from the Late Jurassic–Early Cretaceous transition, *Norwegian Journal of*  
883 *Geology/Norsk Geologisk Forening*, 92, 65-87, 2012.

884 Faleide, J. I., Solheim, A., Fiedler, A., Hjelstuen, B. O., Andersen, E. S., and Vanneste, K.: Late Cenozoic  
885 evolution of the western Barents Sea–Svalbard continental margin, *Global and Planetary Change*, 12,  
886 53-74, [https://doi.org/10.1016/0921-8181\(95\)00012-7](https://doi.org/10.1016/0921-8181(95)00012-7), 1996.

887 Gasser, D.: The Caledonides of Greenland, Svalbard and other Arctic areas: status of research and  
888 open questions, Geological Society, London, Special Publications, 390, 93-129,  
889 <https://doi.org/10.1144/SP390.17>, 2014.

890 Gilbert, G. L., O'Neill, H. B., Nemec, W., Thiel, C., Christiansen, H. H., and Buylaert, J. P.: Late  
891 Quaternary sedimentation and permafrost development in a Svalbard fjord-valley, *Norwegian high*  
892 *Arctic, Sedimentology*, 65, 2531-2558, <https://doi.org/10.1111/sed.12476>, 2018.

893 Grundvåg, S.-A., Jelby, M. E., Śliwińska, K. K., Nøhr-Hansen, H., Aadland, T., Sandvik, S. E., Tennvassås,  
894 I., Engen, T., and Olausson, S.: Sedimentology and palynology of the Lower Cretaceous succession of  
895 central Spitsbergen: integration of subsurface and outcrop data, *Norwegian Journal of Geology*, 99,  
896 253-284, <https://doi.org/10.17850/njg006>, 2019.

897 Harada, K. and Yoshikawa, K.: Permafrost age and thickness near Adventfjorden, Spitsbergen, *Polar*  
898 *Geography*, 20, 267-281, <https://doi.org/10.1080/10889379609377607>, 1996.

899 Henriksen, E., Bjørnseth, H., Hals, T., Heide, T., Kiryukhina, T., Kløvjan, O., Larssen, G., Ryseth, A.,  
900 Rønning, K., and Sollid, K.: Uplift and erosion of the greater Barents Sea: impact on prospectivity and  
901 petroleum systems, Geological Society, London, Memoirs, 35, 271-281,  
902 <https://doi.org/10.1144/M35.17>, 2011.

903 Hodson, A. J., Nowak, A., Holmlund, E., Redeker, K. R., Turchyn, A. V., and Christiansen, H. H.:  
904 Seasonal dynamics of Methane and Carbon Dioxide evasion from an open system pingo: Lagoon  
905 Pingo, Svalbard, *Frontiers in Earth Science*, 30, 1-12, <https://doi.org/10.3389/feart.2019.00030>, 2019.

906 Hodson, A. J., Nowak, A., Senger, K., Redeker, K., Christiansen, H. H., Jessen, S., Hornum, M. T.,  
907 Betlem, P., Thornton, S. F., and Turchyn, A. V.: Open system pingos as hotspots for sub-permafrost  
908 methane emission in Svalbard, *The Cryosphere Discussions*, 1-21, 2020.

909 Hornum, M. T., Hodson, A. J., Jessen, S., Bense, V., and Senger, K.: Numerical modelling of permafrost  
 910 spring discharge and open-system pingo formation induced by basal permafrost aggradation, *The*  
 911 *Cryosphere Discussions*, 1-36, <https://doi.org/10.5194/tc-14-4627-2020>, 2020.  
 912 Howarth, R. W., Santoro, R., and Ingraffea, A.: Methane and the greenhouse-gas footprint of natural  
 913 gas from shale formations, *Climatic change*, 106, 679, <https://doi.org/10.1007/s10584-011-0061-5>,  
 914 2011.  
 915 Humlum, O.: Holocene permafrost aggradation in Svalbard, Geological Society, London, Special  
 916 Publications, 242, 119-129, <https://doi.org/10.1144/GSL.SP.2005.242.01.11>, 2005.  
 917 Humlum, O., Instanes, A., and Sollid, J. L.: Permafrost in Svalbard: a review of research history,  
 918 climatic background and engineering challenges, *Polar research*, 22, 191-215, 2003.  
 919 Huq, F., Smalley, P. C., Mørkved, P. T., Johansen, I., Yarushina, V., and Johansen, H.: The  
 920 Longyearbyen CO<sub>2</sub> Lab: Fluid communication in reservoir and caprock, *International Journal of*  
 921 *Greenhouse Gas Control*, 63, 59-76, <https://doi.org/10.1016/j.ijggc.2017.05.005>, 2017.  
 922 Hynne, I. B.: Depositional environment on eastern Svalbard and central Spitsbergen during Carnian  
 923 time (Late Triassic): A sedimentological investigation of the De Geerdalen Formation, Institutt for  
 924 geovitenskap og petroleum, Norwegian University of Science and Technology, Trondheim, 2010.  
 925 Isaksen, K., Mühl, D. V., Gubler, H., Kohl, T., and Sollid, J. L.: Ground surface-temperature  
 926 reconstruction based on data from a deep borehole in permafrost at Janssonhaugen, Svalbard,  
 927 *Annals of Glaciology*, 31, 287-294, <https://doi.org/10.3189/172756400781820291>, 2000.  
 928 Jochmann, M. M., Augland, L. E., Lenz, O., Bieg, G., Haugen, T., Grundvåg, S. A., Jelby, M. E.,  
 929 Midtkandal, I., Dolezych, M., and Hjálmsdóttir, H. R.: Sylfjellet: a new outcrop of the Paleogene Van  
 930 Mijenfjorden Group in Svalbard, *arktos*, 1-22, 2019.  
 931 Johansen, T. A., Digraanes, P., van Schaack, M., and Lønne, I.: Seismic mapping and modeling of near-  
 932 surface sediments in polar areas, *Geophysics*, 68, 566-573, <https://doi.org/10.1190/1.1567226>, 2003.  
 933 Juliussen, H., Jochmann, M., and Christiansen, H. H.: High-mountain permafrost temperature  
 934 monitoring in central Svalbard; implications for Arctic coal mining., *Third European Conference on*  
 935 *Permafrost; EUCOP III*, Svalbard, 06/13/2010,  
 936 Kamath, A., Godbole, S., Ostermann, R., and Collett, T.: Evaluation of the stability of gas hydrates in  
 937 northern Alaska, *Cold Regions Science and Technology*, 14, 107-119, [https://doi.org/10.1016/0165-](https://doi.org/10.1016/0165-232X(87)90026-7)  
 938 [232X\(87\)90026-7](https://doi.org/10.1016/0165-232X(87)90026-7), 1987.  
 939 Keating, K., Binley, A., Bense, V., Van Dam, R. L., and Christiansen, H. H.: Combined geophysical  
 940 measurements provide evidence for unfrozen water in permafrost in the adventdalen valley in  
 941 Svalbard, *Geophysical Research Letters*, 45, 7606-7614, <https://doi.org/10.1029/2017GL076508>,  
 942 2018.  
 943 Klausen, T. G., Nyberg, B., and Helland-Hansen, W.: The largest delta plain in Earth's history, *Geology*,  
 944 47, 470-474, <https://doi.org/10.1130/G45507.1>, 2019.  
 945 Knoblauch, C., Beer, C., Liebner, S., Grigoriev, M. N., and Pfeiffer, E.-M.: Methane production as key  
 946 to the greenhouse gas budget of thawing permafrost, *Nature Climate Change*, 8, 309-312,  
 947 <https://doi.org/10.1038/s41558-018-0095-z>, 2018.  
 948 Koevoets, M. J., Hammer, Ø., Olaussen, S., Senger, K., and Smelror, M.: Integrating subsurface and  
 949 outcrop data of the middle Jurassic to Lower Cretaceous Agardhfjellet formation in central  
 950 Spitsbergen, *Norwegian Journal of Geology*, 98, 1-34, 2018.  
 951 Kristensen, L., Benn, D. I., Holmes, A., and Ottesen, D.: Mud aprons in front of Svalbard surge  
 952 moraines: evidence of subglacial deforming layers or proglacial glaciotectionics?, *Geomorphology*,  
 953 111, 206-221, 2009.  
 954 Landvik, J., Mangerud, J., and Salvigsen, O.: Glacial history and permafrost in the Svalbard area,  
 955 *Proceedings of the 5th International Conference on Permafrost*, 194-198,  
 956 Landvik, J. Y., Brook, E. J., Gualtieri, L., Raisbeck, G., Salvigsen, O., and Yiou, F. o.: Northwest Svalbard  
 957 during the last glaciation: Ice-free areas existed, *Geology*, 31, 905-908, 2003.  
 958 Landvik, J. Y., Bondevik, S., Elverhøi, A., Fjeldskaar, W., Mangerud, J., Salvigsen, O., Siegert, M. J.,  
 959 Svendsen, J.-I., and Vorren, T. O.: The last glacial maximum of Svalbard and the Barents Sea area: ice

sheet extent and configuration, *Quaternary Science Reviews*, 17, 43-75,  
[https://doi.org/10.1016/S0277-3791\(97\)00066-8](https://doi.org/10.1016/S0277-3791(97)00066-8), 1998.

Lasabuda, A., Laberg, J. S., Knutsen, S.-M., and Safronova, P.: Cenozoic tectonostratigraphy and pre-glacial erosion: A mass-balance study of the northwestern Barents Sea margin, Norwegian Arctic, *Journal of Geodynamics*, 119, 149-166, <https://doi.org/10.1016/j.jog.2018.03.004>, 2018.

Lashof, D. A. and Ahuja, D. R.: Relative contributions of greenhouse gas emissions to global warming, *Nature*, 344, 529-531, <https://doi.org/10.1038/344529a0>, 1990.

Leith, T., Weiss, H., Mørk, A., Elvebakk, G., Embry, A., Brooks, P., Stewart, K., Pchelina, T., Bro, E., and Verba, M.: Mesozoic hydrocarbon source-rocks of the Arctic region, in: Norwegian petroleum society special publications, Elsevier, 1-25, <https://doi.org/10.1016/B978-0-444-88943-0.50006-X>, 1993.

Leythaeuser, D., Mackenzie, A., Schaefer, R. G., and Bjørøy, M.: A novel approach for recognition and quantification of hydrocarbon migration effects in shale-sandstone sequences, *AAPG bulletin*, 68, 196-219, <https://doi.org/10.1306/AD4609FE-16F7-11D7-8645000102C1865D>, 1984.

Lind, S., Ingvaldsen, R. B., and Furevik, T.: Arctic warming hotspot in the northern Barents Sea linked to declining sea-ice import, *Nature climate change*, 8, 634-639, 2018.

Lord, G. S., Solvi, K. H., Ask, M., Mørk, A., Hounsflow, M. W., and Paterson, N. W.: The hopen member: a new member of the Triassic De Geerdalen Formation, Svalbard, *Norwegian Petroleum Directorate Bulletin*, 11, 81-96, 2014.

Lytkevich, E. M.: Geology of Tertiary Coals of Spitzbergen, Isfjord Region, *Truds Arkticheskogo Instituta*, 76, 7-24, 1937.

Magnabosco, C., Braathen, A., and Ogata, K.: Permeability model of tight reservoir sandstones combining core-plug and Miniperm analysis of drillcore; Longyearbyen CO2 Lab, Svalbard, *Norwegian journal of geology*, 94, 189-200, 2014.

Magoon, L. and Dow, W.: Mapping the Petroleum System--An Investigative Technique to Explore the Hydrocarbon Fluid System, *AAPG Memoir*, 73, 53-68, 2000.

Majewski, W. and Zajaczkowski, M.: Benthic foraminifera in Adventfjorden, Svalbard: Last 50 years of local hydrographic changes, *The Journal of Foraminiferal Research*, 37, 107-124, <https://doi.org/10.2113/gsjfr.37.2.107>, 2007.

Majorowicz, J. and Hannigan, P.: Stability Zone of Natural Gas Hydrates in a Permafrost-Bearing Region of the Beaufort—Mackenzie Basin: Study of a Feasible Energy Source<sup>1</sup> (Geological Survey of Canada Contribution No. 1999275), *Natural resources research*, 9, 3-26, <https://doi.org/10.1023/A:1010105628952>, 2000.

Makogon, Y. and Omelchenko, R.: Commercial gas production from Messoyakha deposit in hydrate conditions, *Journal of Natural Gas Science and Engineering*, 11, 1-6, <https://doi.org/10.1016/j.jngse.2012.08.002>, 2013.

Marshall, C., Large, D. J., Meredith, W., Snape, C. E., Uguna, C., Spiro, B. F., Orheim, A., Jochmann, M., Mokogwu, I., and Wang, Y.: Geochemistry and petrology of Palaeocene coals from Spitsbergen—Part 1: Oil potential and depositional environment, *International Journal of Coal Geology*, 143, 22-33, <https://doi.org/10.1016/j.coal.2015.03.006>, 2015.

Marum, D. M., Afonso, M. D., and Ochoa, B. B.: Optimization of the Gas-Extraction Process in a New Mud-Logging System, *SPE Drilling & Completion*, 35, 13, <https://doi.org/10.2118/198909-PA>, 2019.

Masoudi, R. and Tohidi, B.: Estimating the hydrate stability zone in the presence of salts and/or organic inhibitors using water partial pressure, *Journal of Petroleum Science and Engineering*, 46, 23-36, <https://doi.org/10.1016/j.petrol.2004.10.002>, 2005.

Michelsen, J. K. and Khorasani, G. K.: A regional study on coals from Svalbard; organic facies, maturity and thermal history, *Bulletin de la Société Géologique de France*, 162, 385-397, 1991.

Minshull, T. A., Marín-Moreno, H., Betlem, P., Bialas, J., Buenz, S., Burwicz, E., Cameselle, A. L., Cifci, G., Giustiniani, M., and Hillman, J. I.: Hydrate occurrence in Europe: A review of available evidence, *Marine and Petroleum Geology*, 111, 735-764, <https://doi.org/10.1016/j.marpetgeo.2019.08.014>, 2020.

Mørk, M. B. E.: Compositional Variations and Provenance of Triassic Sandstones from the Barents Shelf, *Journal of Sedimentary Research*, 69, 690-710, <https://doi.org/10.2110/jsr.69.690>, 1999.

Mørk, M. B. E.: Diagenesis and quartz cement distribution of low-permeability Upper Triassic–Middle Jurassic reservoir sandstones, Longyearbyen CO2 lab well site in Svalbard, Norway, *AAPG Bulletin*, 97, 577-596, <https://doi.org/10.1306/10031211193>, 2013.

Nielsen, T., Laier, T., Kuijpers, A., Rasmussen, T. L., Mikkelsen, N. E., and Nørgård-Pedersen, N.: Fluid flow and methane occurrences in the Disko Bugt area offshore West Greenland: indications for gas hydrates?, *Geo-Marine Letters*, 34, 511-523, <https://doi.org/10.1007/s00367-014-0382-2>, 2014.

Norsk Hydro: Final Well Report - 7816/12-1, HarstadSVA021, 122, 1991.

Norsk Polar Navigasjon A/S: Geological Report - Tromsøbreen No. 1, Stabekk, Oslo, 1977a.

Norsk Polar Navigasjon A/S: Final Drilling Report - Tromsøbreen No. 1, Stabekk, Oslo, 1977b.

Norsk Polarinstitutt: Svalbardkartet, Norsk Polarinstitutt, Norsk Polarinstitutt WebGIS, Tromsø, 2015.

Norske Fina A/S: Geological Report - Well Hopen No. 1, Stabekk, Oslo, 1971a.

Norske Fina A/S: Final Drilling Report - Well Hopen No. 1, Stabekk, Oslo, 1971b.

Norske Fina A/S: Geological Report - Well: Plurdalen No. 1, Norske Fina, 1972a.

Norske Fina A/S: Final Drilling Report - Well: Plurdalen No.1, Norske Fina, 71, 1972b.

Norske Fina A/S: Geological Report - Well Hopen No. 2, Stabekk, Oslo, 1973a.

Norske Fina A/S: Final Drilling Report - Well Hopen No. 2, 1973b.

Exploration Activity: <https://www.norskpetroleum.no/en/exploration/exploration-activity/>, last access: 20/07/2020.

Nøttvedt, A., Cecchi, M., Gjølberg, J., Kristensen, S., Lønøy, A., Rasmussen, A., Rasmussen, E., Skott, P., and Van Veen, P.: Svalbard-Barents Sea correlation: a short review, in: *Norwegian Petroleum Society Special Publications*, Elsevier, 363-375, 1993.

Ohm, S., Larsen, L., Olaussen, S., Senger, K., Birchall, T., Demchuk, T., Hodson, A., Johansen, I., Titlestad, G. O., Karlsen, D. A., and Braathen, A.: Discovery of shale gas in organic-rich Jurassic successions, Adventdalen, Central Spitsbergen, Norway, *Norwegian Journal of Geology*, 99, 28, <https://dx.doi.org/10.17850/njg007>, 2019.

Ohm, S. E., Karlsen, D. A., and Austin, T.: Geochemically driven exploration models in uplifted areas: Examples from the Norwegian Barents Sea, *AAPG Bulletin*, 92, 1191-1223, <https://doi.org/10.1306/06180808028>, 2008.

Olaussen, S., Senger, K., Braathen, A., Grundvåg, S. A., and Mørk, A.: You learn as long as you drill; research synthesis from the Longyearbyen CO2 Laboratory, Svalbard, Norway, *Norwegian Journal of Geology*, 99, 157-187, <https://dx.doi.org/10.17850/njg008>, 2019.

Olaussen, S., Larssen, G. B., Helland-Hansen, W., Johannessen, E. P., Nøttvedt, A., Riis, F., Rismyhr, B., Smelror, M., and Worsley, D.: Mesozoic strata of Kong Karls Land, Svalbard, Norway; a link to the northern Barents Sea basins and platforms, *Norwegian Journal of Geology*, 98, 1-69, 2018.

Osterkamp, T. and Payne, M.: Estimates of permafrost thickness from well logs in northern Alaska, *Cold Regions Science and Technology*, 5, 13-27, [https://doi.org/10.1016/0165-232X\(81\)90037-9](https://doi.org/10.1016/0165-232X(81)90037-9), 1981.

Piepjohn, K.: The Svalbardian-Ellesmerian deformation of the Old Red Sandstone and the pre-Devonian basement in NW Spitsbergen (Svalbard), *Geological Society, London, Special Publications*, 180, 585-601, <https://doi.org/10.1144/GSL.SP.2000.180.01.31>, 2000.

Polargas Prospektering KB: Geological Report - Tromsøbreen No. 2, Stabekk, Oslo, 1988.

Polyakova, I.: Petroleum source rocks of the Arctic region, *Lithology and Mineral Resources*, 50, 26-49, <https://doi.org/10.1134/S002449021406008X>, 2015.

Rachlewicz, G. and Szczuciński, W.: Changes in thermal structure of permafrost active layer in a dry polar climate, *Petuniabukta, Svalbard, Polish Polar Research*, 29, 261-278, 2008.

Rismyhr, B., Bjærke, T., Olaussen, S., Mulrooney, M., and Senger, K.: Facies, palynostratigraphy and sequence stratigraphy of the Wilhelmøya Subgroup (Upper Triassic–Middle Jurassic) in western central Spitsbergen, Svalbard, *Norwegian Journal of Geology*, 99, 35-64, <https://dx.doi.org/10.17850/njg001>, 2019.

Ronen, S., Rokkan, A., Bouraly, R., Valsvik, G., Larson, L., Ostensvig, E., Paillet, J., Dynia, A., Matlosz, A., and Brown, S.: Imaging shallow gas drilling hazards under three Forties oil field platforms using ocean-bottom nodes, *The Leading Edge*, 31, 465-469, <https://doi.org/10.1190/tle31040465.1>, 2012.

Roy, S., Hovland, M., Noormets, R., and Olaussen, S.: Seepage in Isfjorden and its tributary fjords, West Spitsbergen, *Marine Geology*, 363, 146-159, <http://dx.doi.org/10.1016/j.margeo.2015.02.003>, 2015.

Schmitt, D., Welz, M., and Rokosh, C.: High-resolution seismic imaging over thick permafrost at the 2002 Mallik drill site, *Geological Survey of Canada Bulletin*, 585, 125, 2005.

Schulson, E. M.: Brittle failure of ice, *Engineering fracture mechanics*, 68, 1839-1887, [https://doi.org/10.1016/S0013-7944\(01\)00037-6](https://doi.org/10.1016/S0013-7944(01)00037-6), 2001.

Senger, K., Tveranger, J., Ogata, K., Braathen, A., and Planke, S.: Late Mesozoic magmatism in Svalbard: A review, *Earth-Science Reviews*, 139, 123-144, <https://doi.org/10.1016/j.earscirev.2014.09.002>, 2014.

Senger, K., Birchall, T., Betlem, P., Ogata, K., Ohm, S., Olaussen, S., and Paulsen, R. S.: Resistivity of reservoir sandstones and organic rich shales on the Barents Shelf: Implications for interpreting CSEM data, *Geoscience Frontiers*, 64, <https://doi.org/10.1016/j.gsf.2020.08.007>, 2020.

Senger, K., Brugmans, P., Grundvåg, S.-A., Jochmann, M. M., Nøttvedt, A., Olaussen, S., Skotte, A., and Smyrak-Sikora, A.: Petroleum, coal and research drilling onshore Svalbard: a historical perspective, *Norwegian Journal of Geology*, 99, 30, <https://doi.org/10.17850/njg99-3-1>, 2019.

Skorobogatov, V. A., Yakushev, V. S., and Chuvilin, E. M.: Sources of natural gas within permafrost; North-West Siberia, *Permafrost Proceedings Seventh International Conference, Collection Nordicana*, 1001-1007,

Sloan Jr, E. D., Koh, C. A., and Koh, C.: *Clathrate hydrates of natural gases*, CRC press 2007.

Smyrak-Sikora, A., Johannessen, E. P., Olaussen, S., Sandal, G., and Braathen, A.: Sedimentary architecture during Carboniferous rift initiation—the arid Billefjorden Trough, Svalbard, *Journal of the Geological Society*, 176, 225-252, <https://doi.org/10.1144/jgs2018-100>, 2019.

SNSK: Report SN1979\_002, Longyearbyen, 14, 1979.

SNSK: Drawing Nr. 14204-3; Borhullslogg 79/11 Endalen, Longyearbyen, 1980.

SNSK: Report SN1981\_008, Longyearbyen, 52, 1981.

SNSK: Report SN1982\_004, Longyearbyen, 14, 1982a.

SNSK: Report SN1982\_005, Longyearbyen, 14, 1982b.

SNSK: Report SN1986\_001, Longyearbyen, 14, 1986.

SNSK: Report SN1991.04, Longyearbyen, 14, 1991.

SNSK: Report - Kapp Laila - 1, Longyearbyen, 110, 1994.

SNSK: BH 19-2011 Drilling Report, Longyearbyen, 14, 2011a.

SNSK: BH 18-2011 Drilling Report, Longyearbyen, 14, 2011b.

SNSK: BH 16-2011 Drilling Report, Longyearbyen, 14, 2011c.

SNSK: BH 14-2011 Drilling Report, Longyearbyen, 14, 2011d.

SNSK: BH 7-2013 Drilling Report, Longyearbyen, 14, 2013a.

SNSK: BH 10-2013 Drilling Report, Longyearbyen, 14, 2013b.

SNSK: BH 6-2013 Drilling Report, Longyearbyen, 14, 2013c.

SNSK: BH 8-2014 Drilling Report, Longyearbyen, 14, 2014.

Steel, R., Dalland, A., Kalgraff, K., and Larsen, V.: The Central Tertiary Basin of Spitsbergen: sedimentary development of a sheared-margin basin, *AAPG Memoir*, 7, 647-664, 1981.

Steel, R. J. and Worsley, D.: Svalbard's post-Caledonian strata - an atlas of sedimentational patterns and paleogeographic evolution, in: *Petroleum Geology of the North European Margin*, edited by: Spencer, A. M., Graham & Trotman, London, 109-135, [https://doi.org/10.1007/978-94-009-5626-1\\_9](https://doi.org/10.1007/978-94-009-5626-1_9), 1984.

Strand, S. M., Christiansen, H. H., Johansson, M., Åkerman, J., and Humlum, O.: Active layer thickening and controls on interannual variability in the Nordic Arctic compared to the circum-Arctic, *Permafrost and Periglacial Processes*, DOI:10.1002/ppp.2088, in press.

Total Marine Norsk: Final Well Report - Raddedalen I, 1972.

Uguna, J. O., Carr, A. D., Marshall, C., Large, D. J., Meredith, W., Jochmann, M., Snape, C. E., Vane, C. H., Jensen, M. A., and Olaussen, S.: Improving spatial predictability of petroleum resources within the Central Tertiary Basin, Spitsbergen: a geochemical and petrographic study of coals from the eastern

and western coalfields, *International Journal of Coal Geology*, 179, 278-294,  
<https://doi.org/10.1016/j.coal.2017.06.007>, 2017.

van Pelt, W. J., Kohler, J., Liston, G., Hagen, J. O., Luks, B., Reijmer, C., and Pohjola, V. A.: Multidecadal climate and seasonal snow conditions in Svalbard, *Journal of Geophysical Research: Earth Surface*, 121, 2100-2117, <https://doi.org/10.1002/2016JF003999>, 2016.

Verba, M.: Kollektornye svoystva porod osadochnogo chekhla arkipelaga Shpitsbergen [Sedimentary cover reservoir of Svalbard archipelago], *Neftegazovaya Geologiya. Teoriya I Praktika*, 8, 1-45, 2013.

Vonk, J. E. and Gustafsson, Ö.: Permafrost-carbon complexities, *Nature Geoscience*, 6, 675-676, <https://doi.org/10.1038/ngeo1937>, 2013.

Vrielink, H. J., Bradford, J. S., Basarab, L., and Ubaru, C. C.: Successful application of casing-while-drilling technology in a Canadian arctic permafrost application, *IADC/SPE Drilling Conference*, <https://doi.org/10.2118/111806-MS>,

Westermann, S., Wollschläger, U., and Boike, J.: Monitoring of active layer dynamics at a permafrost site on Svalbard using multi-channel ground-penetrating radar, *The Cryosphere*, 4, 475-487, <https://doi.org/10.5194/tc-4-475-2010>, 2010.

Yakushev, V. and Chuvilin, E.: Natural gas and gas hydrate accumulations within permafrost in Russia, *Cold regions science and technology*, 31, 189-197, [https://doi.org/10.1016/S0165-232X\(00\)00012-4](https://doi.org/10.1016/S0165-232X(00)00012-4), 2000.

## Author Contribution

**Thomas Birchall:** Conceptualisation, methodology, validation, investigation, data curation, writing – original draft, writing – review and editing, visualisation, project administration.

**Malte Jochmann:** Conceptualization, Validation, Investigation, Resources, Data Curation, writing – reviewing

**Peter Betlem:** Methodology, Software, Validation, writing – reviewing

**Kim Senger:** Conceptualization, methodology, validation, resources, writing – reviewing, supervision

**Andrew Hodson:** Validation, writing – reviewing, supervision

**Snorre Olaussen:** Validation, writing – reviewing, supervision

## Competing Interests

The authors have no known competing interests.

## Data Availability

The historical nature of the data and reports means they are available in hard-copy only. Reports referenced in this article are proprietary to their respective companies.

For permafrost and hydrate stability modelling herein, the methodology is detailed in the following publication:

<https://doi.org/10.1016/j.marpetgeo.2018.10.050>
